# Supplementary material
Source: PubMed Central journal article supplement (PMC4743041)

Supporting Information  
for DOI: 10.1055/s-0034-1379319  
© Georg Thieme Verlag KG Stuttgart · New York 2014

# **Copper-Catalyzed Aerobic C–H Trifluoromethylation of Phenanthrolines**

Cheng-Liang Zhu, Yong-Qiang Zhang, Yong-An Yuan, and Hao Xu\*

*Department of Chemistry, Georgia State University, Atlanta, Georgia, 30303, United States*

## **Supporting Material**

### **A. General Information**

### **B. Procedures for the Copper-Catalyzed Aerobic C–H Trifluoromethylation of Phenanthrolines**

#### **a. General Procedures**

#### **b. Control Experiments to Probe for a Possible Mechanism**

### **C. References**

### **D. NMR Spectra**

## A. General Information

**General Procedures.** All reactions were performed in oven-dried or flame-dried round-bottom flasks and vials. Stainless steel syringes and cannula were used to transfer air- and moisture-sensitive liquids. Flash chromatography was performed using silica gel 60 (230-400 mesh) from Sigma–Aldrich.

**Materials.** Commercial reagents were purchased from Sigma Aldrich, Fluka, EM Science, and Lancaster and used as received. All solvents were used after being freshly distilled unless otherwise noted.

**Instrumentation.** Proton nuclear magnetic resonance ( $^1\text{H}$ NMR) spectra, carbon nuclear magnetic resonance ( $^{13}\text{C}$  NMR) spectra and fluorine nuclear magnetic resonance ( $^{19}\text{F}$  NMR) were recorded on Bruker UltraShield-400 (400 MHz). Chemical shifts for protons are reported in parts per million downfield from tetramethylsilane and are referenced to the NMR solvent residual peak ( $\text{CHCl}_3$ :  $\delta$  7.26). Chemical shifts for carbons are reported in parts per million downfield from tetramethylsilane and are referenced to the carbon resonances of the NMR solvent ( $\text{CDCl}_3$ :  $\delta$  77.0). Chemical shifts for fluorine are reported in parts per million downfield and are referenced to the fluorine resonances of  $\text{CFCl}_3$ . Data are represented as follows: chemical shift, multiplicity (br = broad, s = singlet, d = doublet, t = triplet, q = quartet, m = multiplet), coupling constants in Hertz (Hz), and integration.

The mass spectroscopic data were obtained at the Georgia State University mass spectrometry facility using a Micromass Platform II single quadrupole instrument. Infrared (IR) spectra were obtained using a Perkin Elmer Spectrum 100 FT-IR spectrometer.

**Abbreviations used:** EtOH–ethanol, EtOAc–ethyl acetate, THF–tetrahydrofuran, MeOH–methanol,  $\text{Et}_2\text{O}$ –diethyl ether,  $\text{CH}_2\text{Cl}_2$ –dichloromethane, TEA–triethylamine, MeCN–acetonitrile, MS–molecular sieves, TLC–thin layer chromatography.

## B. Procedure for the Copper-Catalyzed Aerobic C–H Trifluoromethylation of Phenanthrolines

### a. General Procedures:

To a mixture of 1, 10-phenanthroline **1** (36 mg, 0.2 mmol), Cu (OAc)<sub>2</sub> (7.4 mg, 0.04 mmol), KOAc (9.8mg, 0.1 mmol) and AcOH (6.0  $\mu$ L, 0.1 mmol) in toluene (4.0 mL), TMSCF<sub>3</sub> (30  $\mu$ L, 0.2 mmol) was added at room temperature under O<sub>2</sub> atmosphere. The reaction mixture was stirred 40 °C for 3 hours. Another portion of TMSCF<sub>3</sub> (30  $\mu$ L, 0.2 mmol) was added and continue stirring at 40 °C. The reaction was monitored by TLC. After the starting material was completely consumed, the reaction was quenched by H<sub>2</sub>O and extracted with EtOAc (3x 4 mL). The combined organic layer was washed by brine, dried over Na<sub>2</sub>SO<sub>4</sub> and concentrated *in vacuo*. The product was isolated through a silica gel flash column (40% EtOAc in hexanes) as a white foam (41 mg, 80% yield).

1,10-Phenanthroline, 4,7-diphenyl-1,10-phenanthroline and 4,7-dimethyl-1,10-phenanthroline are commercially available and are used directly without further purification. 3-Phenyl-1,10-phenanthroline,<sup>1</sup> 3,8-diphenyl-1,10-phenanthroline,<sup>2</sup> and 5-nitro-1,10-phenanthroline were synthesized according to literature procedures.<sup>3</sup>

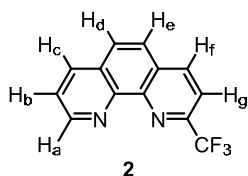

**2-(Trifluoromethyl)-1,10-phenanthroline (2)** : Compound **2** was isolated through a silica gel flash column (80% yield) as a white foam. <sup>1</sup>H NMR (400 MHz, CDCl<sub>3</sub>, ppm):  $\delta$  9.24 (s, H<sub>a</sub>), 8.38 (d,  $J$  = 8.4 Hz, H<sub>f</sub>), 8.23 (d,  $J$  = 8.6 Hz, H<sub>c</sub>), 7.93 (d,  $J$  = 8.4 Hz, H<sub>g</sub>), 7.85, 7.78 (d,  $J$  = 8.8Hz, H<sub>d</sub> & H<sub>e</sub>), 7.65 (m, H<sub>b</sub>); <sup>13</sup>C NMR (100 MHz, CDCl<sub>3</sub>, ppm):  $\delta$  151.06, 147.7 (q,  $J$  = 35.0 Hz), 145.72, 145.56, 137.83, 136.09, 129.76, 129.10, 128.79, 125.70, 123.59, 124.30 (q,  $J$  = 273 Hz), 119.00; <sup>19</sup>F NMR (377 MHz, CDCl<sub>3</sub>, ppm):  $\delta$  -66.59 (s, 3F). IR  $\nu_{\max}$  (neat)/cm<sup>-1</sup>: 3696, 2967, 2217, 1595, 1337, 1112, 851, 746. HRMS (ESI, m/z): calcd for C<sub>13</sub>H<sub>8</sub>N<sub>2</sub>F<sub>3</sub><sup>+</sup> [M+H<sup>+</sup>]: 249.0640, found: 249.0642.

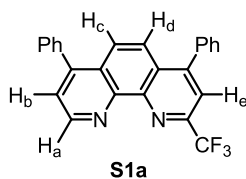

**4,7-Diphenyl-2-(trifluoromethyl)-1,10-phenanthroline (S1a):** Compound **S1a** was isolated through a silica gel flash column as an off-white foam (92% yield).  $^1\text{H}$  NMR (400 MHz,  $\text{CDCl}_3$ , ppm):  $\delta$  9.31 (d,  $J = 4.4$  Hz,  $\text{H}_a$ ), 7.96, 7.87 (d,  $J = 9.6$  Hz,  $\text{H}_c$  &  $\text{H}_d$ ), 7.93 (s,  $\text{H}_e$ ), 7.61 (d,  $J = 4.4$  Hz,  $\text{H}_b$ ), 7.53-7.50 (m, 10H);  $^{13}\text{C}$  NMR (100 MHz,  $\text{CDCl}_3$ , ppm):  $\delta$  150.6, 150.5, 148.6, 147.8, 147.4, 147.1, 146.7, 146.4, 146.4, 137.4, 136.9, 129.5, 129.0, 128.8, 128.6, 127.7, 126.9, 126.3, 125.8, 124.0, 123.4, 123.1, 120.3, 119.5, 119.49, 117.6;  $^{19}\text{F}$  NMR (376 MHz,  $\text{CDCl}_3$ , ppm):  $\delta$  -66.40 (s, 3F); IR  $\nu_{\text{max}}$  (neat)/ $\text{cm}^{-1}$ : 3058, 2212, 1375, 1118, 1072, 838, 726; HRMS (ESI) calcd for  $\text{C}_{25}\text{H}_{16}\text{N}_3\text{F}_3$   $[\text{M}+\text{H}]^+$ : 401.1266, found 401.1251.

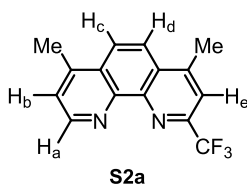

**4,7-Dimethyl-2-(trifluoromethyl)-1,10-phenanthroline (S2a):** Compound **S2a** was isolated through a silica gel flash column as a white foam (61% yield).  $^1\text{H}$  NMR (400 MHz,  $\text{CDCl}_3$ , ppm):  $\delta$  9.13 (d,  $J = 4.4$  Hz,  $\text{H}_a$ ), 8.15, 8.05 (d,  $J = 9.2$  Hz,  $\text{H}_c$  &  $\text{H}_d$ ), 7.81 (s,  $\text{H}_e$ ), 7.50 (d,  $J = 4.0$  Hz,  $\text{H}_b$ ), 2.88 (s, 3H), 2.82 (s, 3H);  $^{13}\text{C}$  NMR (100 MHz,  $\text{CDCl}_3$ , ppm):  $\delta$  150.8, 147.3, 146.7, 146.0, 145.7, 144.4, 129.0, 128.4, 124.6, 124.4, 121.4, 120.0, 119.9, 19.5, 19.0;  $^{19}\text{F}$  NMR (376 MHz,  $\text{CDCl}_3$ , ppm):  $\delta$  -66.59 (s, 3F); IR  $\nu_{\text{max}}$  (neat)/ $\text{cm}^{-1}$ : 3701, 2953, 1397, 1275, 1228, 1130, 1033, 877, 739; HRMS (ESI) calcd for  $\text{C}_{15}\text{H}_{12}\text{N}_3\text{F}_3$   $[\text{M}+\text{H}]^+$ : 277.0953, found 277.0948.

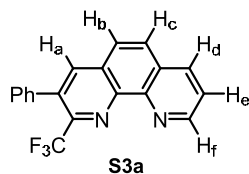

**3-Phenyl-2-(trifluoromethyl)-1,10-phenanthroline (S3a):** Compound **S3a** was isolated through a silica gel flash column as a white foam (64% yield).  $^1\text{H}$  NMR (400 MHz,  $\text{CDCl}_3$ , ppm):  $\delta$  9.31

(d,  $J = 3.6$  Hz  $H_f$ ), 8.31 (d,  $J = 8.0$  Hz,  $H_d$ ), 8.28 (s,  $H_a$ ), 7.95, 7.85 (d,  $H_b$  &  $H_c$ ,  $J = 8.8$  Hz), 7.71 (dd,  $J = 8.0$  Hz, 4.4 Hz,  $H_e$ ), 7.32-7.49 (m, 6H);  $^{13}\text{C}$  NMR (100 MHz,  $\text{CDCl}_3$ , ppm):  $\delta$  151.3, 145.9, 143.9, 139.9, 137.2, 136.3, 136.0, 129.4, 129.2, 129.1, 128.5, 128.4, 126.0, 125.6, 123.6, 123.3, 120.5, 115.8;  $^{19}\text{F}$  NMR (376 MHz,  $\text{CDCl}_3$ , ppm):  $\delta$  -66.53 (s, 3F); IR  $\nu_{\text{max}}$  (neat)/ $\text{cm}^{-1}$ : 3048, 2923, 1721, 1557, 1314, 1125, 930, 697; HRMS (ESI) calcd for  $\text{C}_{19}\text{H}_{12}\text{N}_2\text{F}_3$   $[\text{M}+\text{H}]^+$ : 325.0953, found 325.0941.

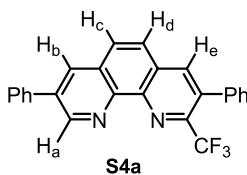

**3,8-Diphenyl-2-(trifluoromethyl)-1,10-phenanthroline (S4a):** Compound **S4a** was isolated through a silica gel flash column as a white foam (52% yield).  $^1\text{H}$  NMR (400 MHz,  $\text{CDCl}_3$ , ppm):  $\delta$  9.56 (s,  $H_a$ ), 8.45 (s,  $H_e$ ), 8.29 (s,  $H_b$ ), 8.01, 7.88 (d,  $J = 8.8$  Hz,  $H_c$  &  $H_d$ ), 7.80 (d,  $J = 7.6$  Hz, 2H), 7.58 (t,  $J = 7.2$  Hz, 2H), 7.261-7.259 (m, 6H);  $^{13}\text{C}$  NMR (100 MHz,  $\text{CDCl}_3$ , ppm):  $\delta$  150.4, 144.7, 139.9, 137.3, 137.2, 136.4, 135.8, 133.6, 129.5, 129.4, 129.3, 129.2, 129.0, 128.6, 128.4, 128.2, 127.6, 126.1;  $^{19}\text{F}$  NMR (376 MHz,  $\text{CDCl}_3$ , ppm):  $\delta$  -60.45 (s, 3F); IR  $\nu_{\text{max}}$  (neat)/ $\text{cm}^{-1}$ : 3706, 2923, 1418, 1315, 1180, 1070, 931, 119, 699; HRMS (ESI) calcd for  $\text{C}_{25}\text{H}_{16}\text{N}_2\text{F}_3$   $[\text{M}+\text{H}]^+$ : 401.1266, found 401.1251.

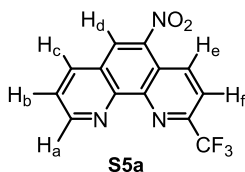

**5-Nitro-2-(trifluoromethyl)-1,10-phenanthroline (S5a)**<sup>5</sup>: Compound **S5a** was isolated through a silica gel flash column as a light yellow foam (17% yield).  $^1\text{H}$  NMR (400 MHz,  $\text{CDCl}_3$ , ppm):  $\delta$  9.47 (d,  $J = 4.4$  Hz,  $H_a$ ), 9.31 (d,  $J = 8.8$  Hz,  $H_f$ ), 8.85 (s,  $H_d$ ), 8.49 (d,  $J = 8.0$  Hz,  $H_c$ ), 8.18 (d,  $J = 8.8$  Hz,  $H_e$ ), 7.85 (dd,  $J = 8.0$  Hz, 4.4 Hz,  $H_b$ );  $^{13}\text{C}$  NMR (100 MHz,  $\text{CDCl}_3$ , ppm):  $\delta$  152.4, 151.1, 150.8, 1150.4, 147.0, 146.0, 140.0, 132.5, 126.8, 125.0, 124.1, 122.5, 121.5;  $^{19}\text{F}$  NMR

(376 MHz, CDCl<sub>3</sub>, ppm):  $\delta$  -67.00 (s, 3F); IR  $\nu_{\max}$  (neat)/cm<sup>-1</sup>: 3083, 2921, 1734, 1525, 1337, 1147, 1071, 846, 781; HRMS (ESI) calcd for C<sub>13</sub>H<sub>7</sub>N<sub>3</sub>O<sub>2</sub>F<sub>3</sub> [M+H]<sup>+</sup>: 294.0490, found 294.0492.

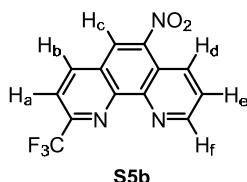

**6-Nitro-2-(trifluoromethyl)-1,10-phenanthroline (S5b):** Compound **S5b** was isolated through a silica gel flash column as a light yellow foam (54% yield). <sup>1</sup>H NMR (400 MHz, CDCl<sub>3</sub>, ppm):  $\delta$  9.41 (d,  $J$  = 4.0 Hz, H<sub>f</sub>), 8.99 (d,  $J$  = 8.8 Hz, H<sub>d</sub>), 8.70 (s, H<sub>c</sub>), 8.66 (d,  $J$  = 8.4 Hz, H<sub>b</sub>), 8.13 (d,  $J$  = 8.0 Hz, H<sub>a</sub>), 7.88 (dd,  $J$  = 8.8 Hz, 4.0 Hz, H<sub>e</sub>); <sup>13</sup>C NMR (100 MHz, CDCl<sub>3</sub>, ppm):  $\delta$  154.5, 149.4, 149.1, 147.4, 145.8, 143.6, 138.1, 135.1, 127.9, 126.1, 125.0, 122.6, 122.4, 120.6, 120.55, 119.8; <sup>19</sup>F NMR (376 MHz, CDCl<sub>3</sub>, ppm):  $\delta$  -67.05 (s, 3F); IR  $\nu_{\max}$  (neat)/cm<sup>-1</sup>: 3053, 2921, 1623, 1529, 1333, 1176, 1071, 913, 843, 768; HRMS (ESI) calcd for C<sub>13</sub>H<sub>7</sub>N<sub>3</sub>O<sub>2</sub>F<sub>3</sub> [M+H]<sup>+</sup>: 294.0490, found 294.0493.

## b. Control Experiments to Probe for a Possible Mechanism

**Scheme S1.** A control experiment in the presence of TEMPO

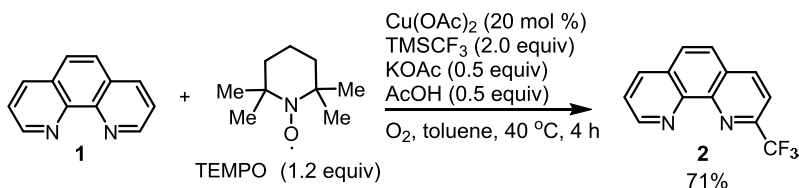

**Procedure:** To a mixture of **1**, 1,10-phenanthroline **1** (18 mg, 0.1 mmol), Cu (OAc)<sub>2</sub> (3.7 mg, 0.02 mmol), KOAc (4.9 mg, 0.05 mmol), HOAc (3.0  $\mu$ L, 0.05 mmol) and TEMPO (19 mg, 0.12 mmol, 1.2 equiv) in toluene (2.0 mL), TMSCF<sub>3</sub> (15  $\mu$ L, 0.1 mmol) was added at room temperature under O<sub>2</sub> atmosphere. The reaction mixture was allowed to stir at 40 °C for 3 hours. Another portion of TMSCF<sub>3</sub> (15  $\mu$ L, 0.1 mmol) was added and continue stirring at 40 °C The

reaction was monitored by TLC. After the starting material was completely consumed, the reaction was quenched by H<sub>2</sub>O and extracted with EtOAc (3x 4 mL). The desired product was purified according to the general procedure.

**Scheme S2.** Control experiment under argon affords 1, 2-dihydrophenanthroline

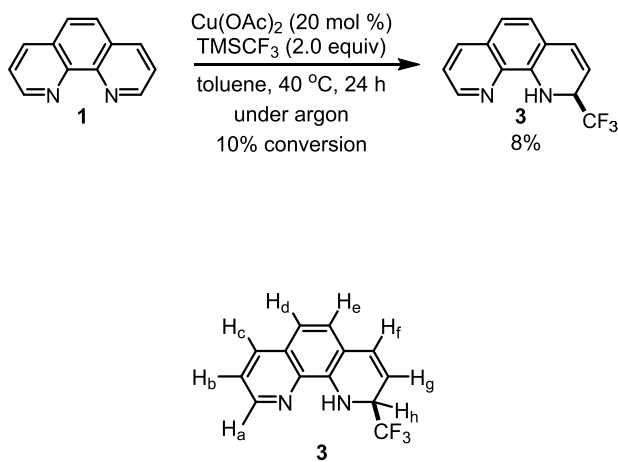

**2-(Trifluoromethyl)-1,2-dihydro-1,10-phenanthroline (3)**<sup>4</sup>: Compound **3** was isolated through a silica gel flash column as colorless oil (8% yield). <sup>1</sup>H NMR (400 MHz, CDCl<sub>3</sub>, ppm): δ 8.72 (d, *J* = 3.2 Hz, H<sub>a</sub>), 8.01 (d, *J* = 8.4 Hz, H<sub>c</sub>), 7.34 (q, *J* = 4.0 Hz, H<sub>b</sub>), 7.14, 7.04 (d, *J* = 8.0 Hz, H<sub>d</sub> & H<sub>e</sub>), 6.77 (d, *J* = 10.0 Hz, H<sub>f</sub>), 6.41 (s, NH), 5.63 (td, *J* = 7.6 Hz, 2.0 Hz, H<sub>g</sub>), 5.12 (m, H<sub>h</sub>); <sup>13</sup>C NMR (100 MHz, CDCl<sub>3</sub>, ppm): δ 147.9, 138.5, 136.6, 136.0, 129.0, 126.0, 125.2, 123.7 (q, *J* = 264 Hz), 121.6, 115.1, 114.2, 113.4, 55.0 (q, *J* = 31 Hz); <sup>19</sup>F NMR (377 MHz, CDCl<sub>3</sub>, ppm): δ -81.24 (d, *J* = 7.5 Hz). IR ν<sub>max</sub> (neat)/cm<sup>-1</sup>: 3672, 2928, 2513, 2159, 2029, 1977, 1384, 1120, 1067. HRMS (ESI, m/z): calcd for C<sub>13</sub>H<sub>10</sub>N<sub>2</sub>F<sub>3</sub><sup>+</sup> [M+H<sup>+</sup>]: 251.0796, found: 251.0791.

**Scheme S3.** Imine trifluoromethylation without the quinolinyl directing group

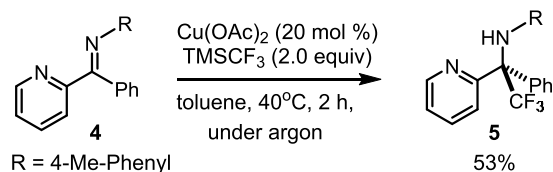



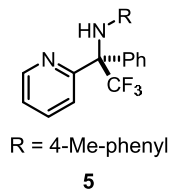

**4-Methyl-N-(2,2,2-trifluoro-1-phenyl-1-(pyridin-2-yl)ethyl)aniline (5)<sup>4</sup>:** Compound **5** was isolated through a silica gel flash column as a white foam (53% yield). <sup>1</sup>H NMR (400 MHz, CDCl<sub>3</sub>, ppm) δ 8.75 (d, *J* = 4.4 Hz, 1H), 7.67 (d, *J* = 6.8 Hz, 2H), 7.61 (t, *J* = 7.6 Hz, 1H), 7.47-7.43 (m, 3H), 7.33-7.30 (m, 1H), 7.19 (s, 1H), 7.06 (d, *J* = 8.0 Hz, 1H), 6.90 (d, *J* = 8.0 Hz, 2H), 6.53 (d, *J* = 8.0 Hz, 2H), 2.25 (s, 3H). <sup>13</sup>C NMR (100 MHz, CDCl<sub>3</sub>, ppm) δ 156.47, 147.21, 141.66, 137.79, 136.57, 128.99, 128.77, 128.42, 128.40, 128.16, 127.22, 126.30 (q, *J* = 290 Hz), 125.03, 123.26, 116.30, 68.79 (q, *J* = 26 Hz), 20.28. <sup>19</sup>F NMR (377 MHz, CDCl<sub>3</sub>, ppm): δ -66.88. IR ν<sub>max</sub> (neat)/cm<sup>-1</sup>: 3346, 1615, 1516, 1257, 1146, 932, 699. HRMS (ESI, m/z): calcd for C<sub>20</sub>H<sub>18</sub>F<sub>3</sub>N<sub>2</sub> [M+H<sup>+</sup>]: 343.1422; Found: 343.1419.

### C. References

1. Case, F. H.; Sasin, R. *J. Org. Chem.*, **1955**, *20*, 1330.
2. Nishikawa, Y.; Yamamoto, H. *J. Am. Chem. Soc.*, **2011**, *133*, 8432.
3. Ji, S.; Guo, H.; Yuan, X.; Li, X.; Ding, H.; Gao, P.; Zhao, C.; Wu, W.; Wu, W.; Zhao, J. *Org. Lett.*, **2010**, *12*, 2876.
4. Zhang, Y.-Q.; Liu, J.-D.; Xu, H. *Org. Biomol. Chem.* **2013**, *11*, 6242.
5. Compounds **S5a** and **S5b** were distinguished from each other by NOESY analysis.

## D. NMR Spectra

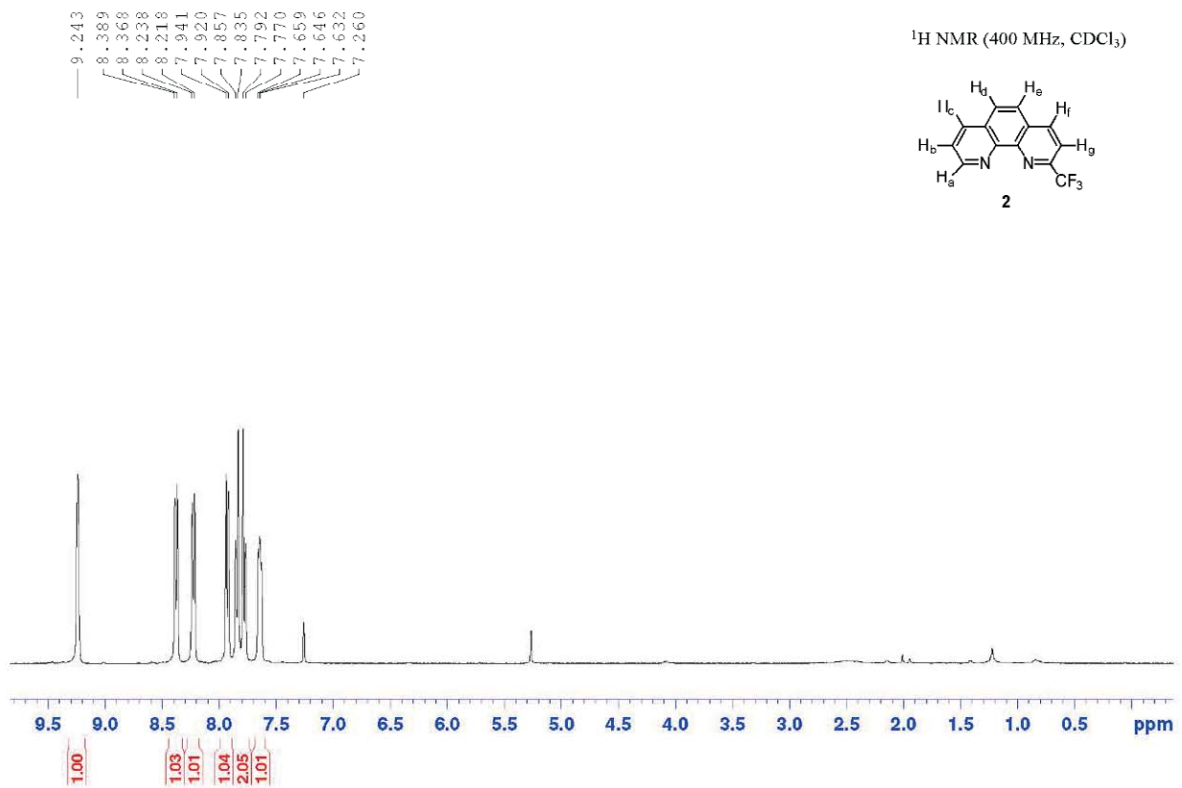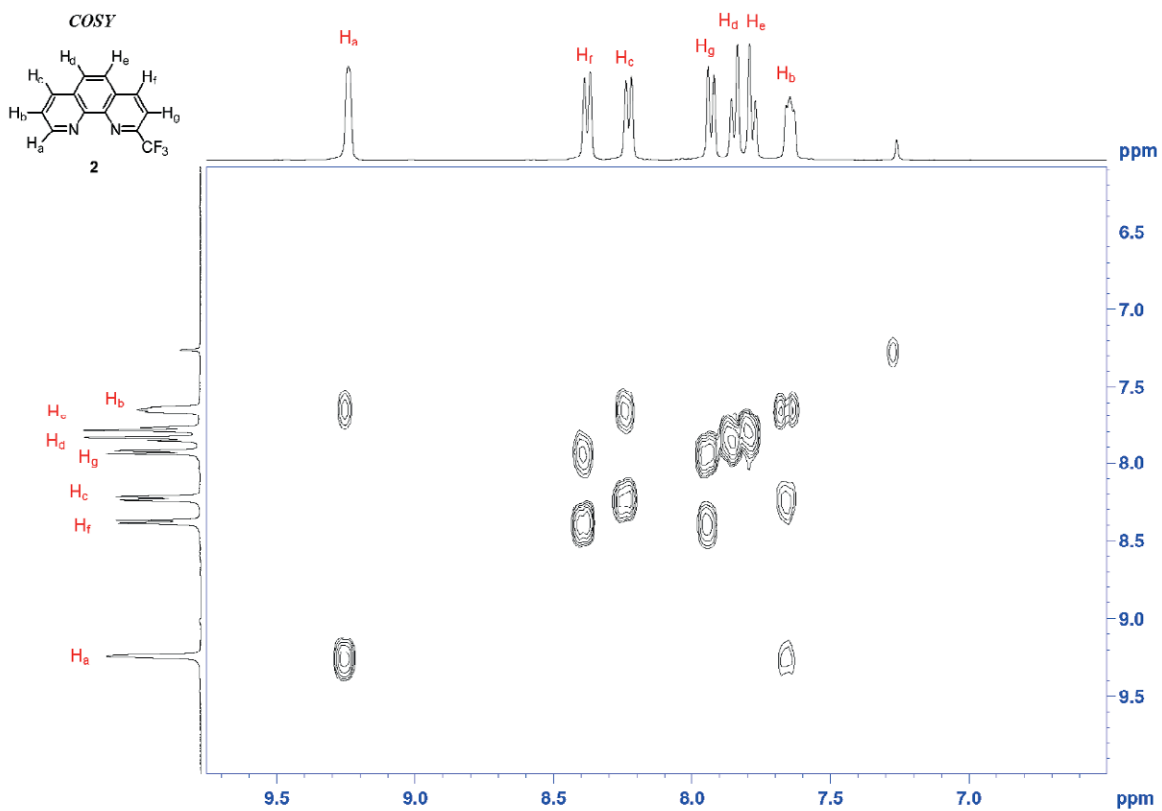

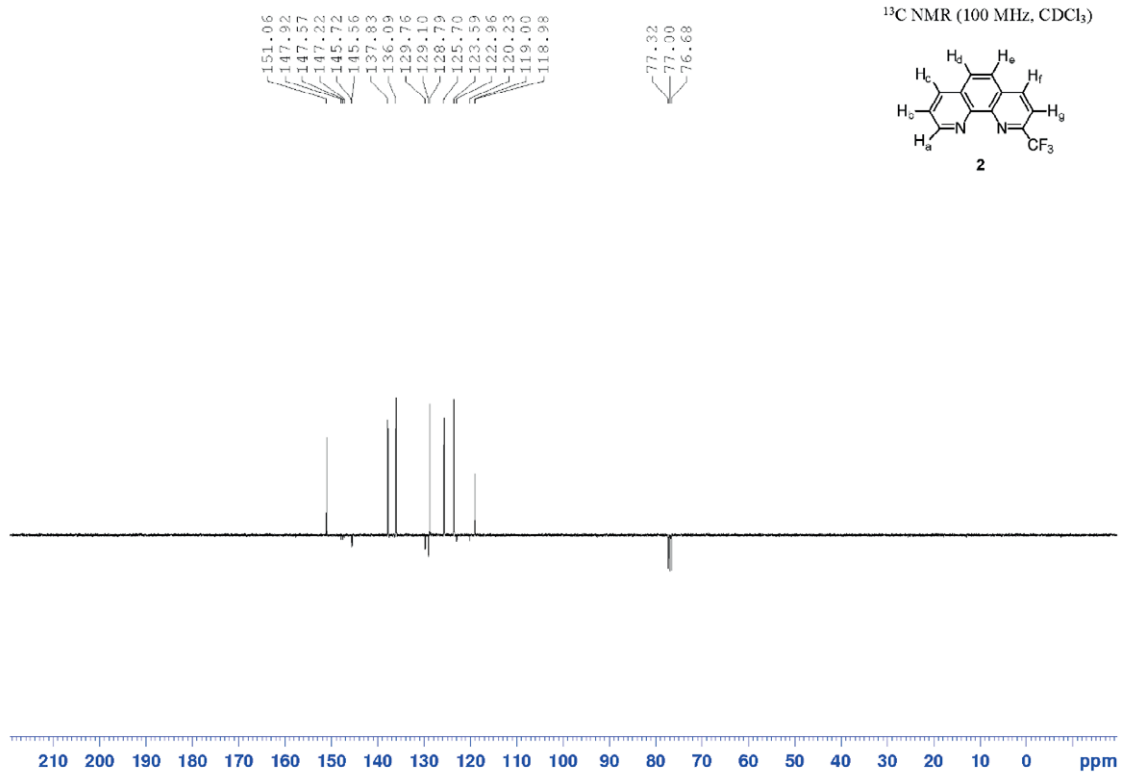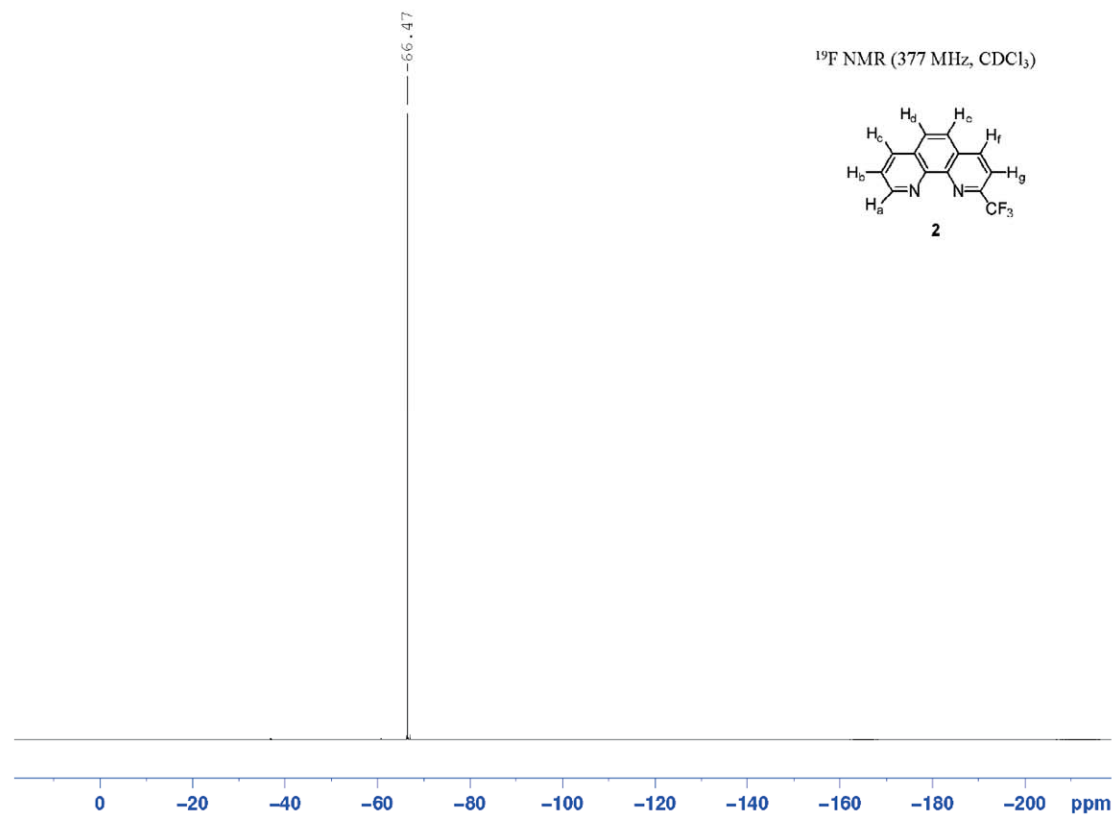

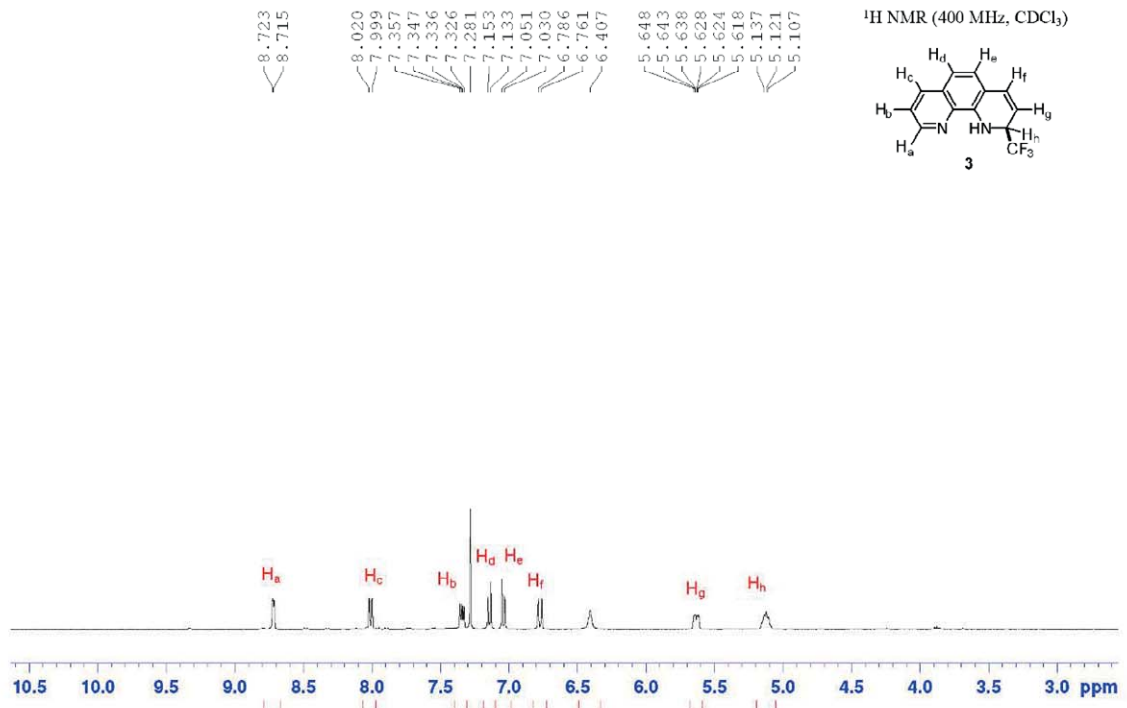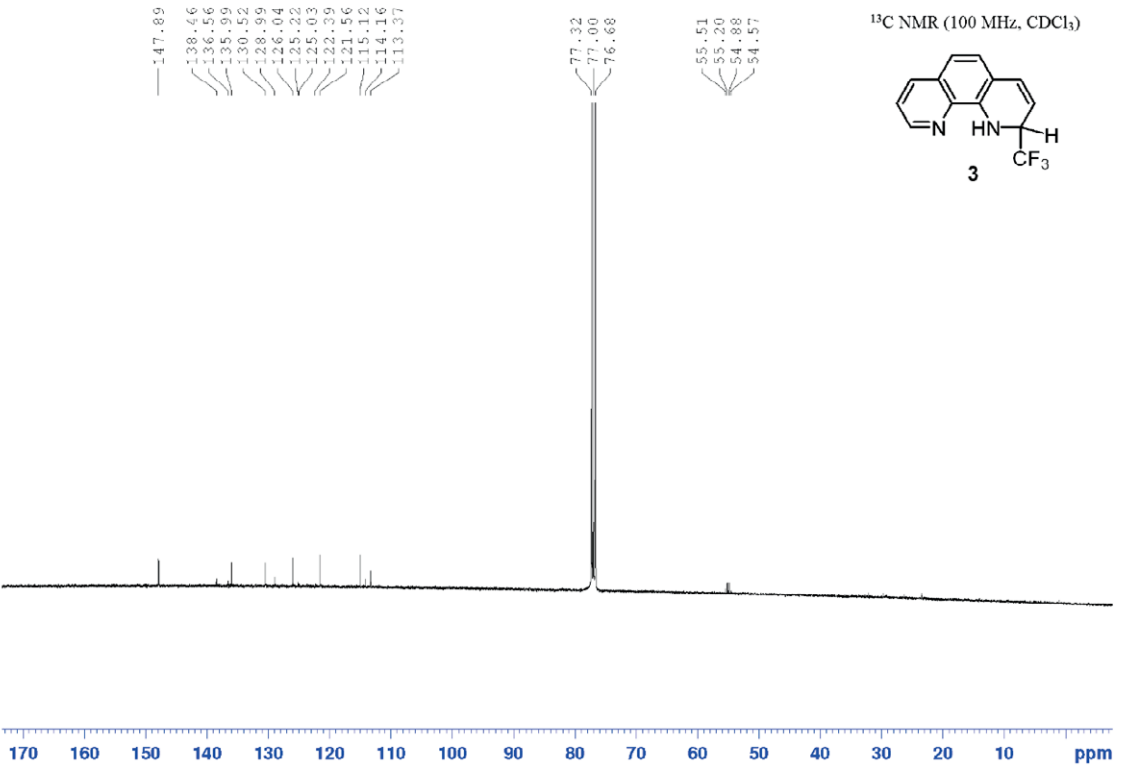

$^{19}\text{F}$  NMR (377 MHz,  $\text{CDCl}_3$ )

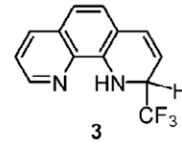

$\delta$  -81.23  
 $\delta$  -81.25

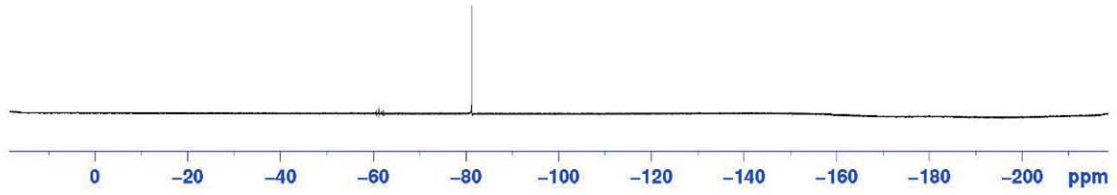

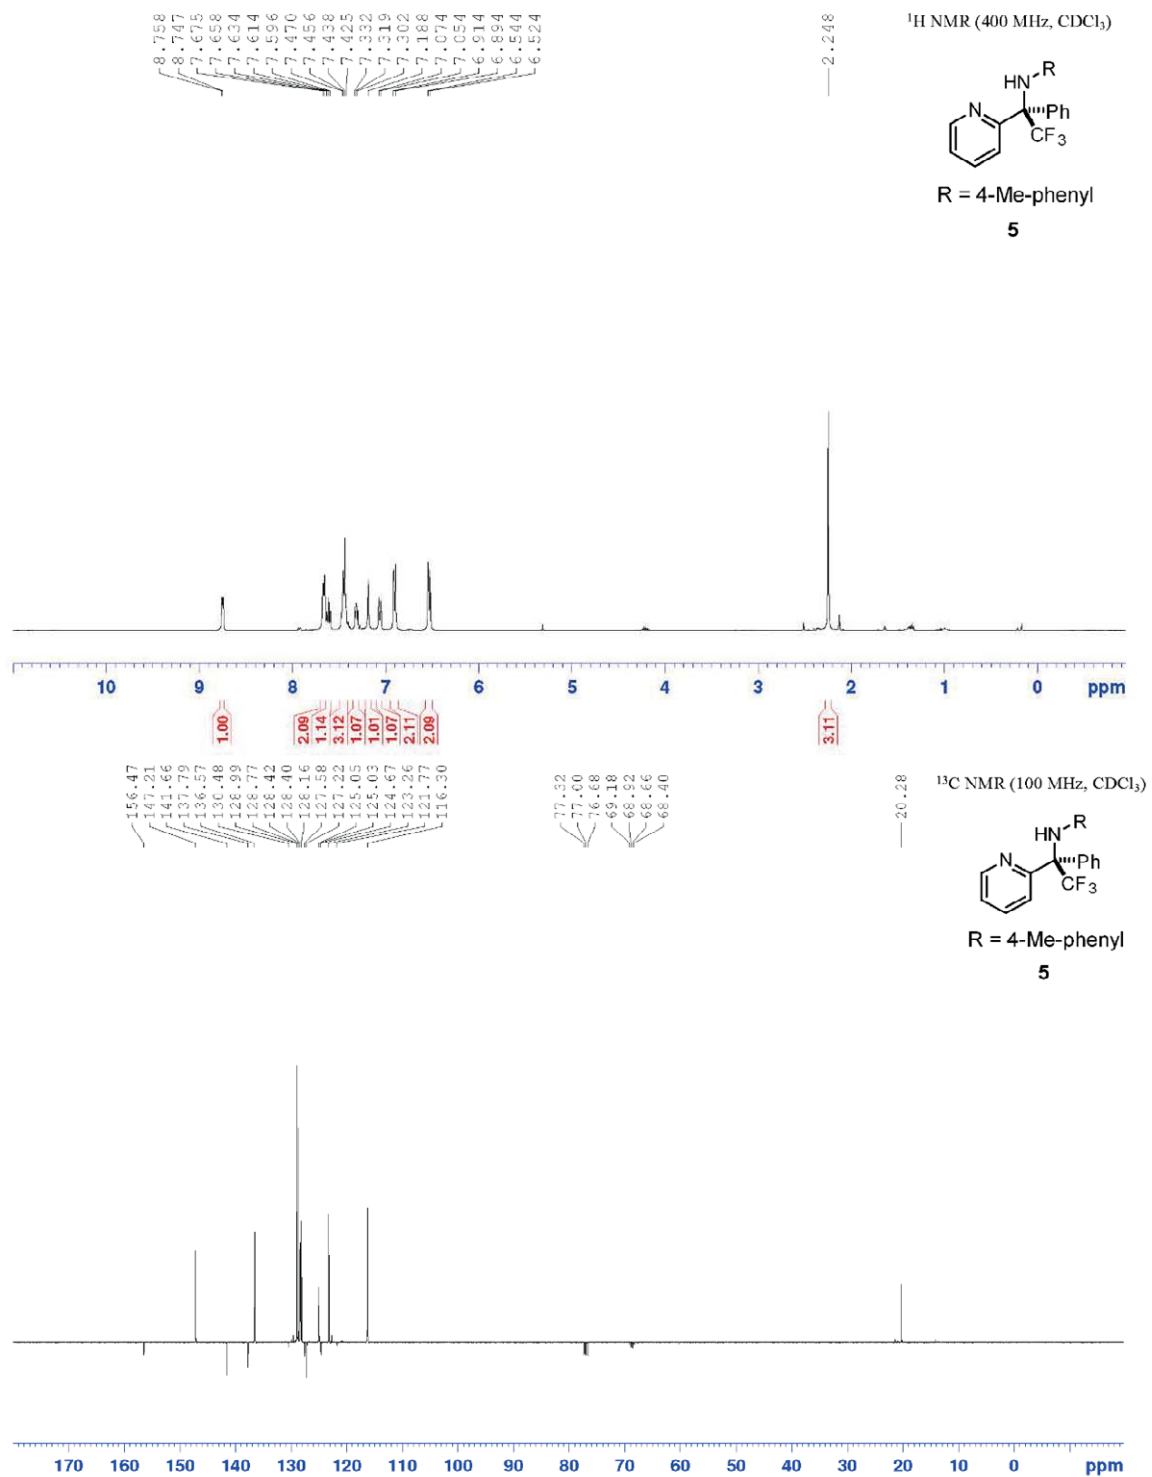

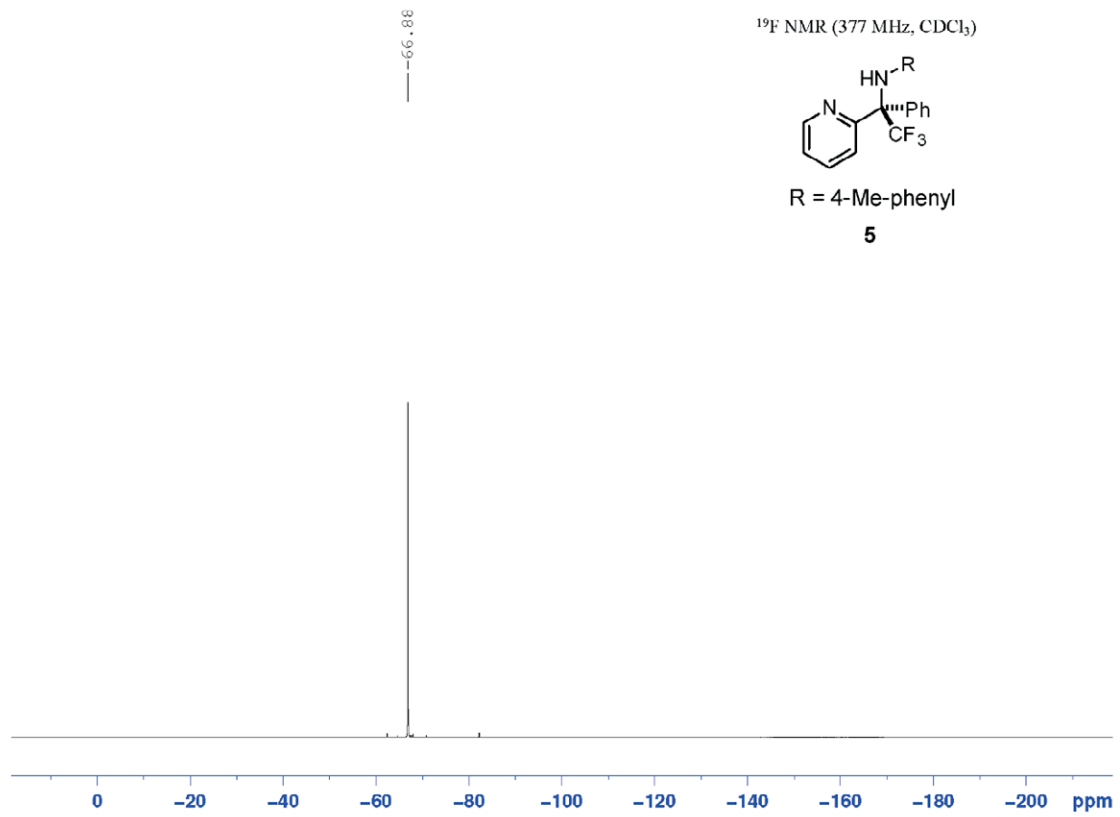

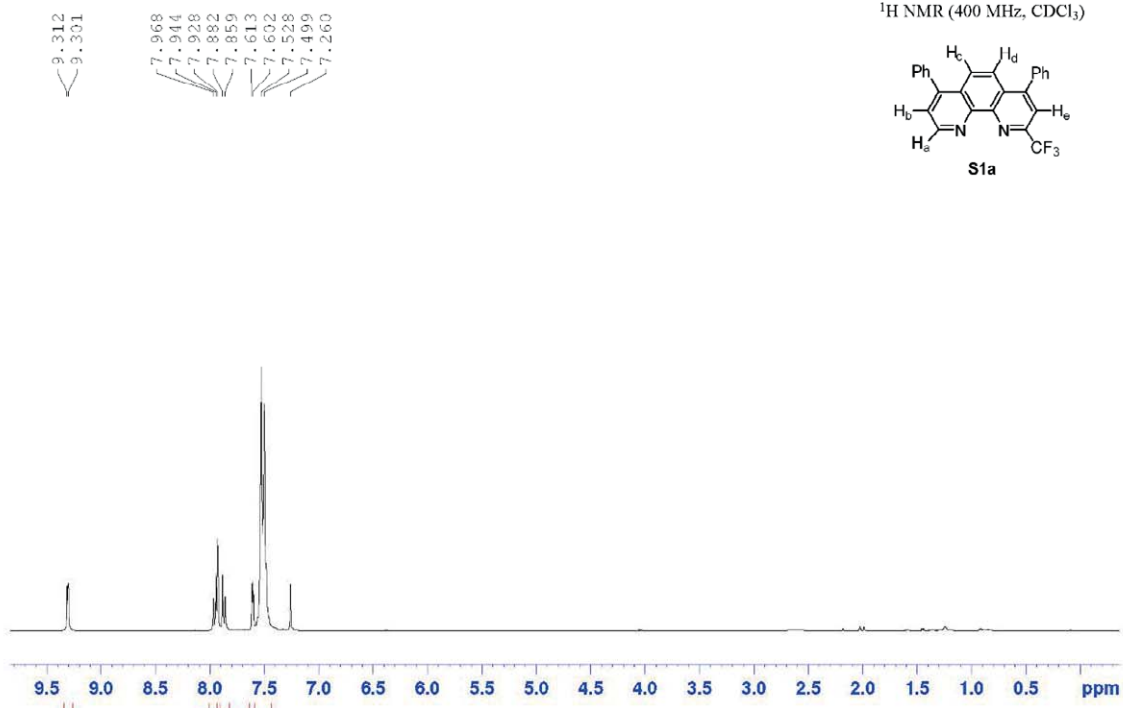

<sup>1</sup>H NMR (400 MHz, CDCl<sub>3</sub>)

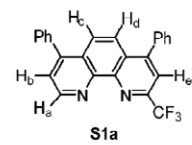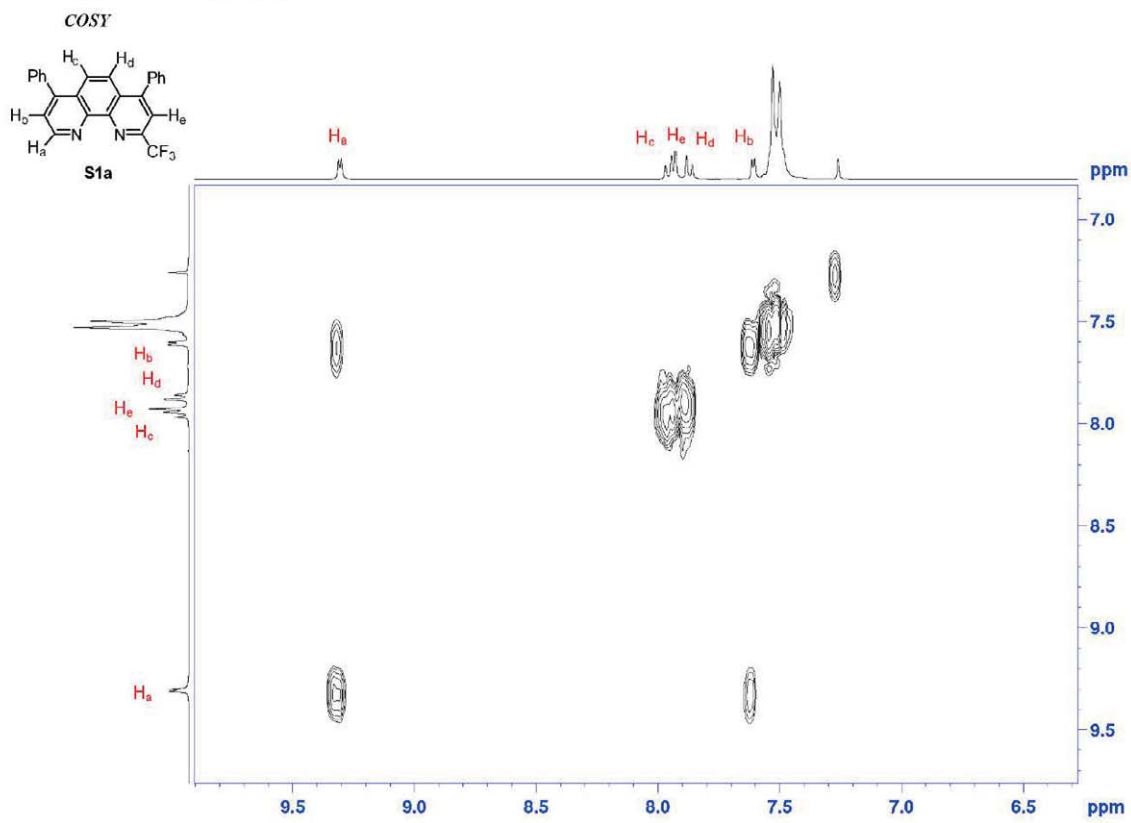



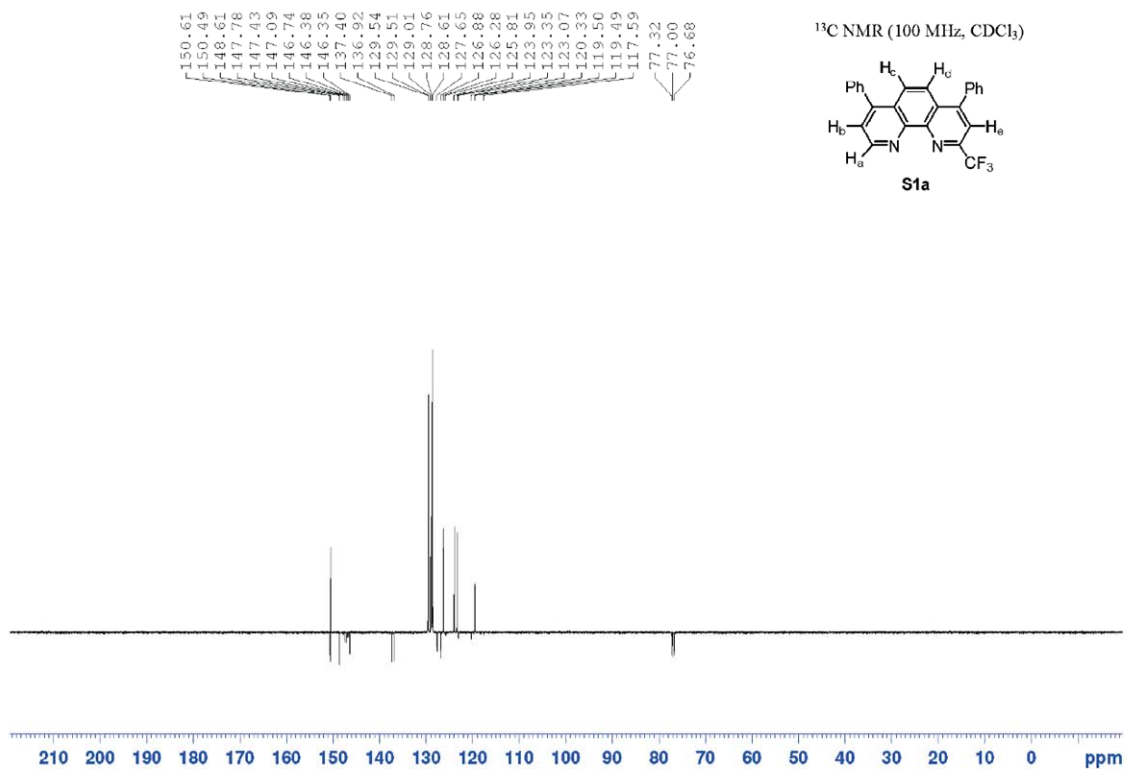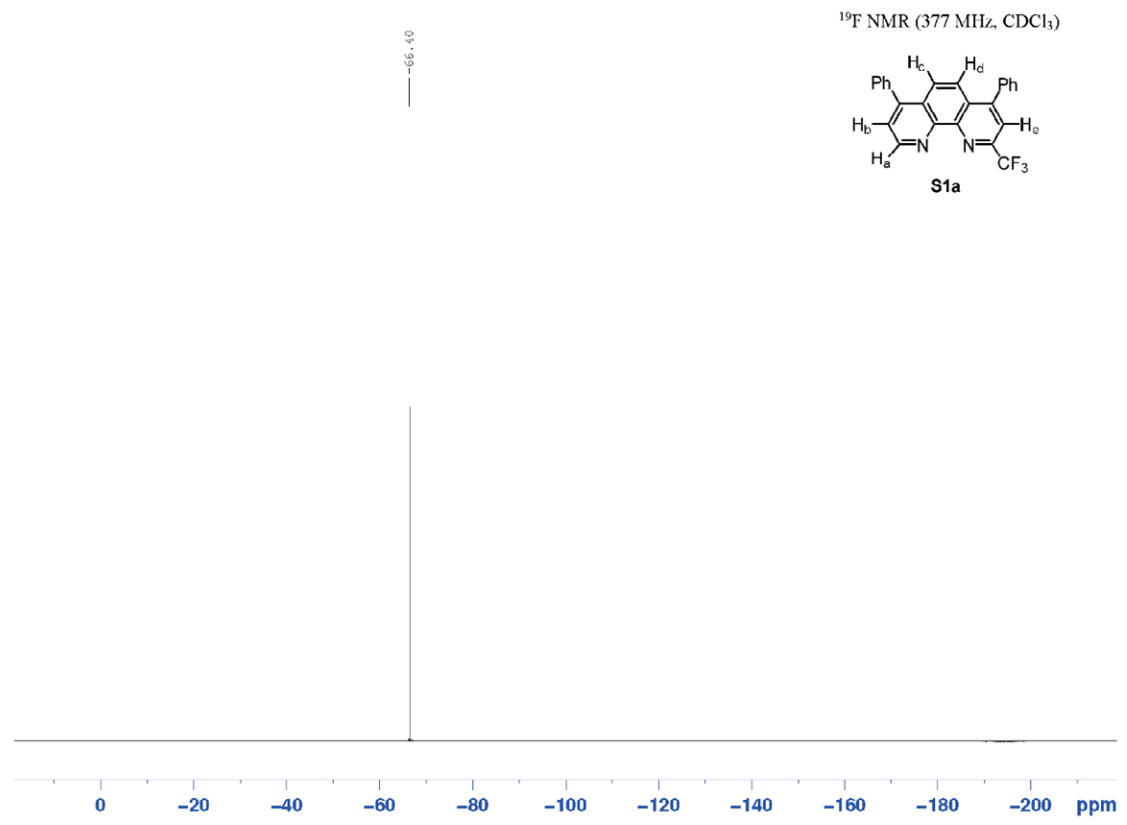

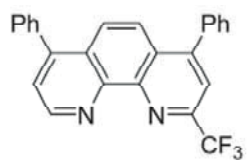

zyq-vi-3,8-diph-phenanthroline-CF3 4 1 C:\Bruker\TopSpin3.0\data\yqzhang

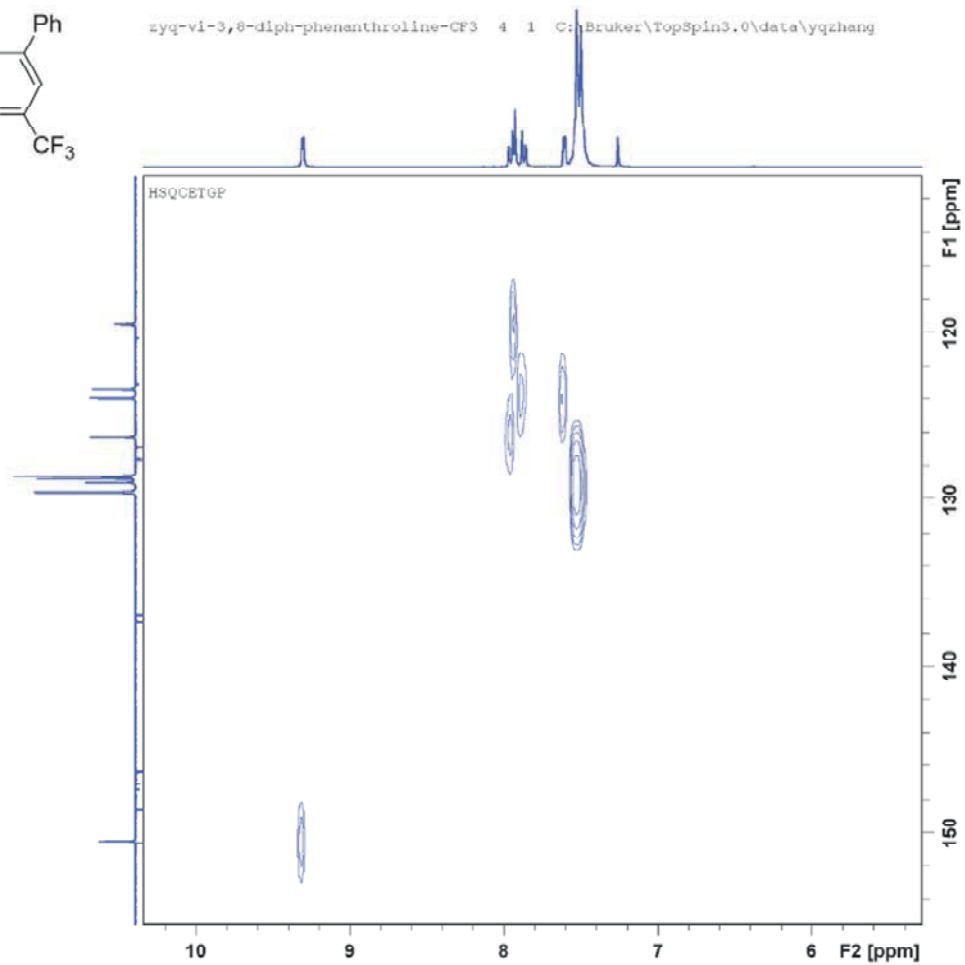

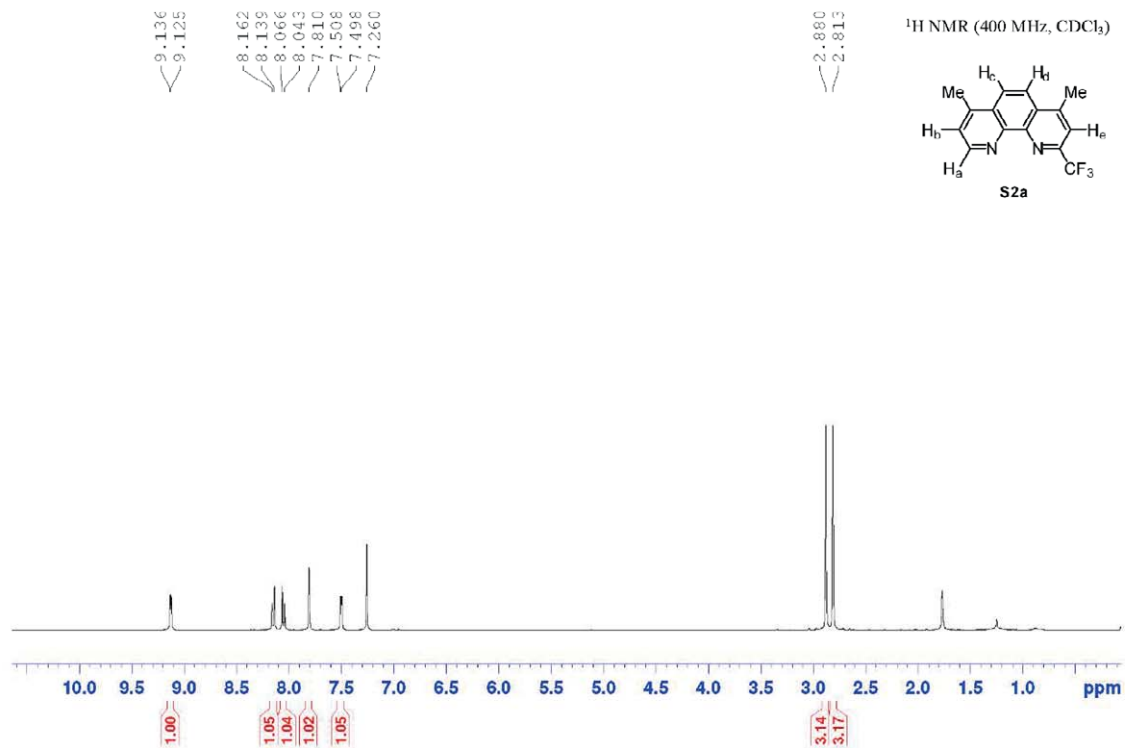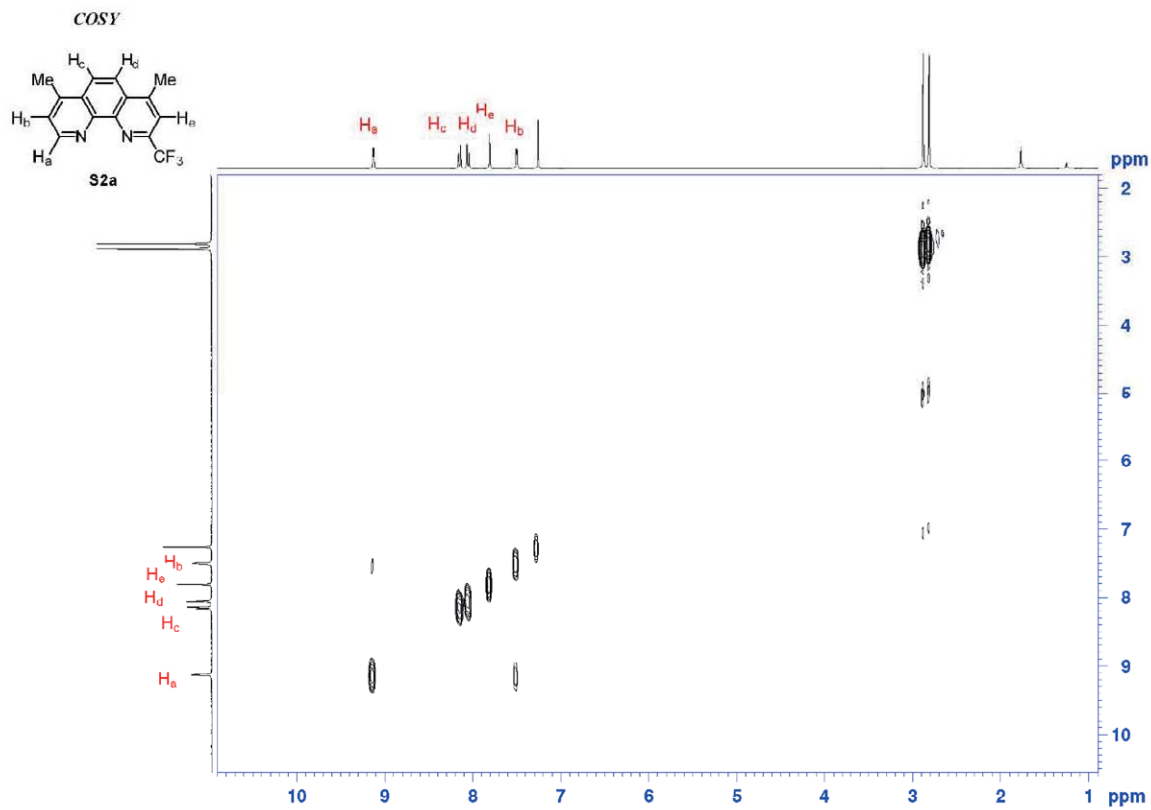

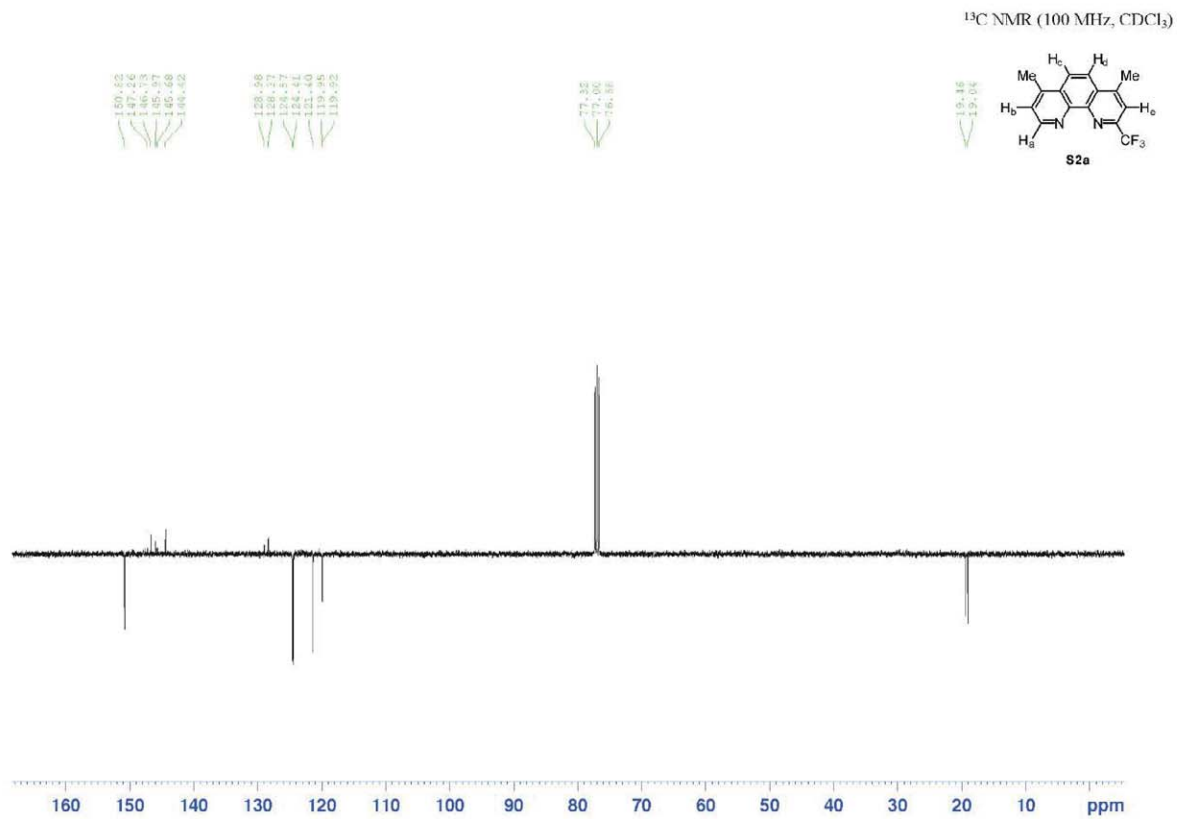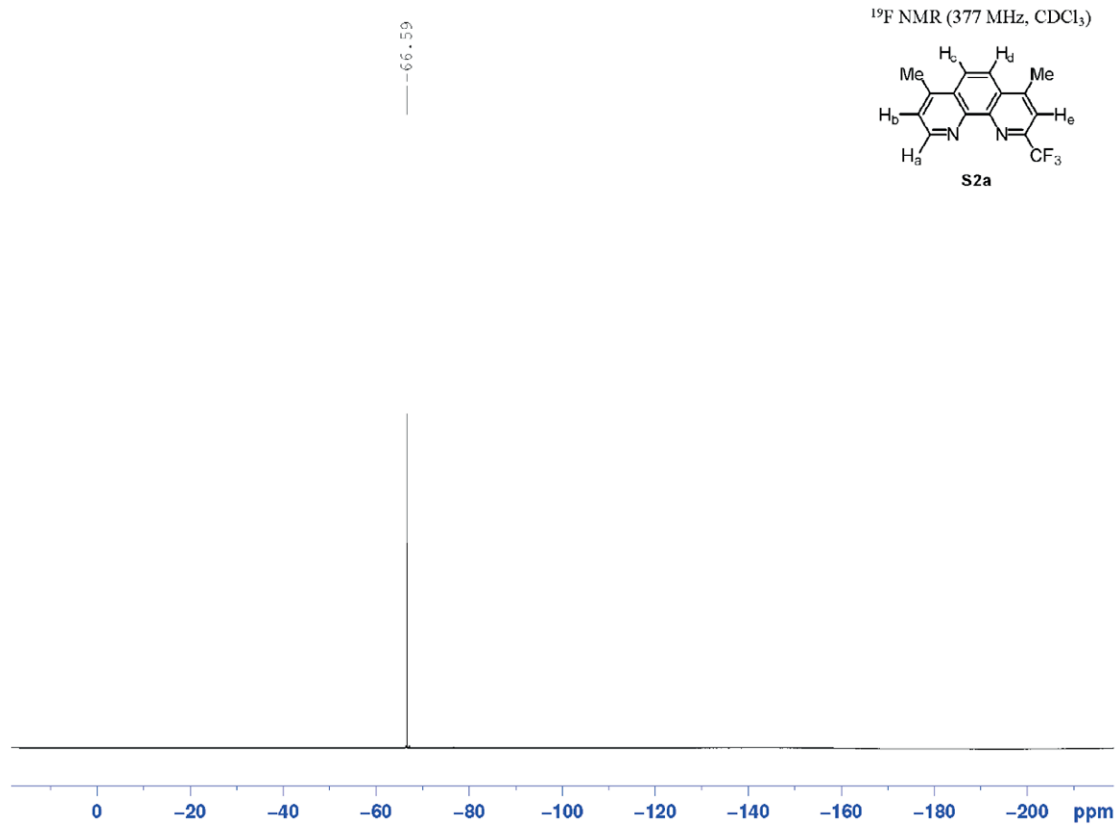

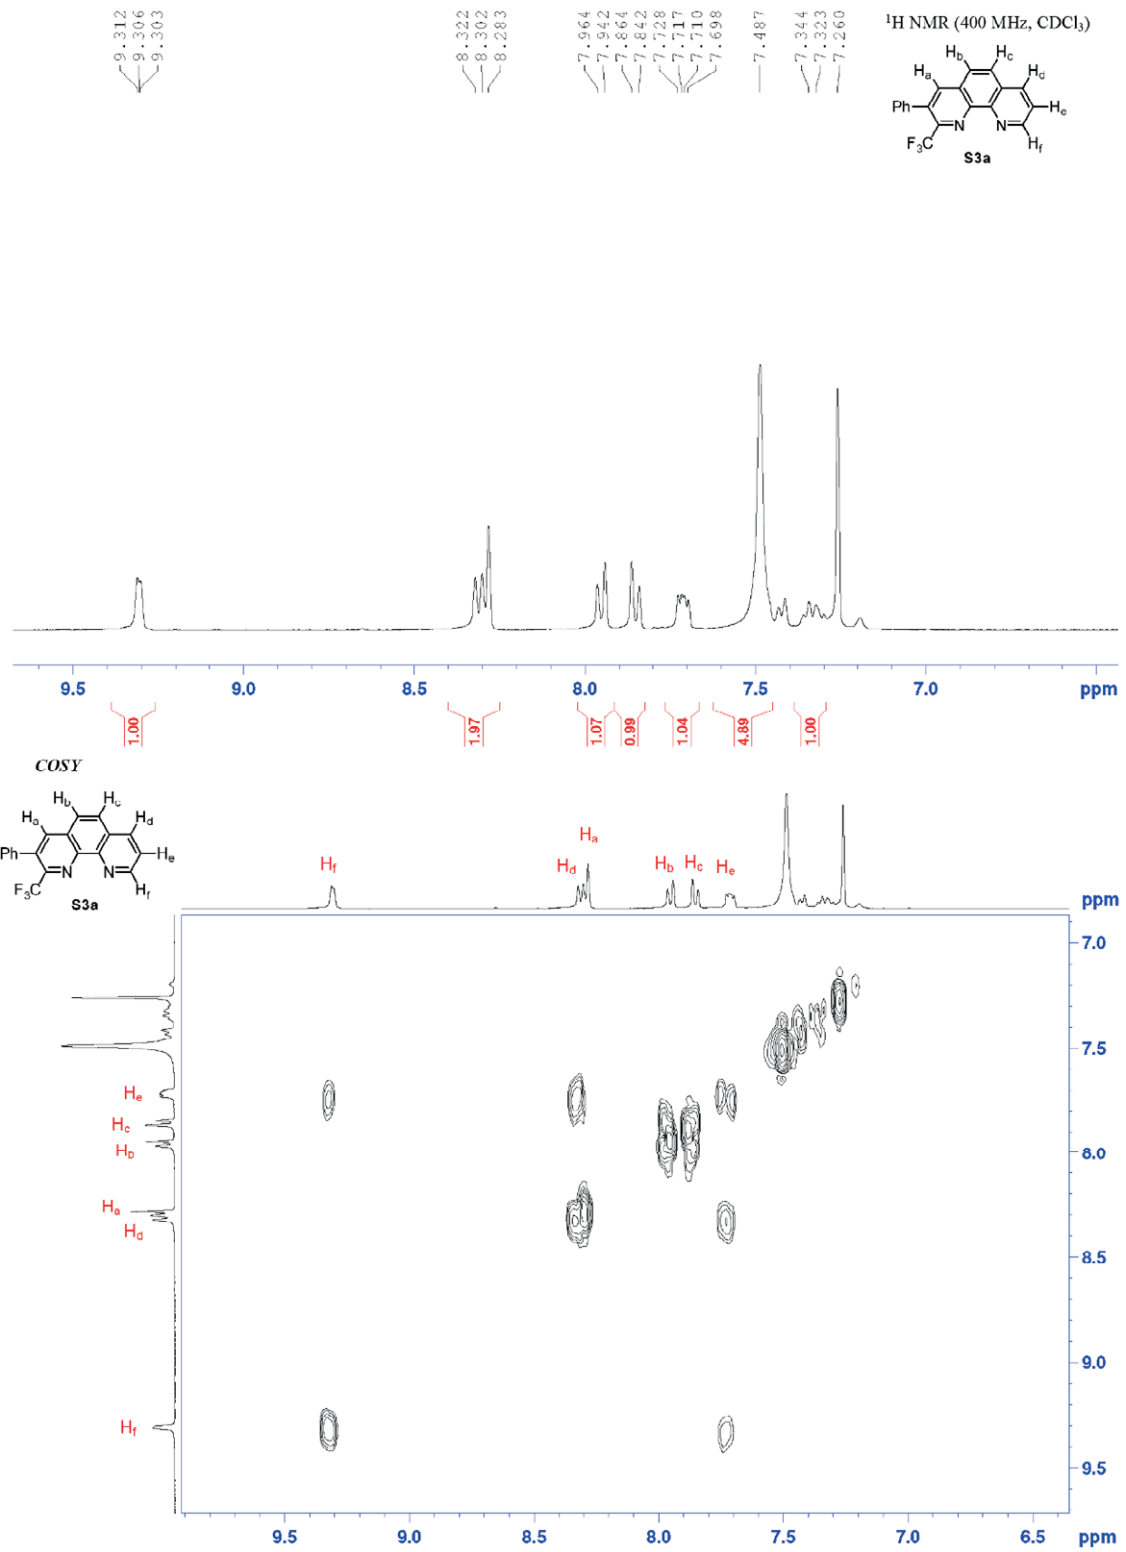

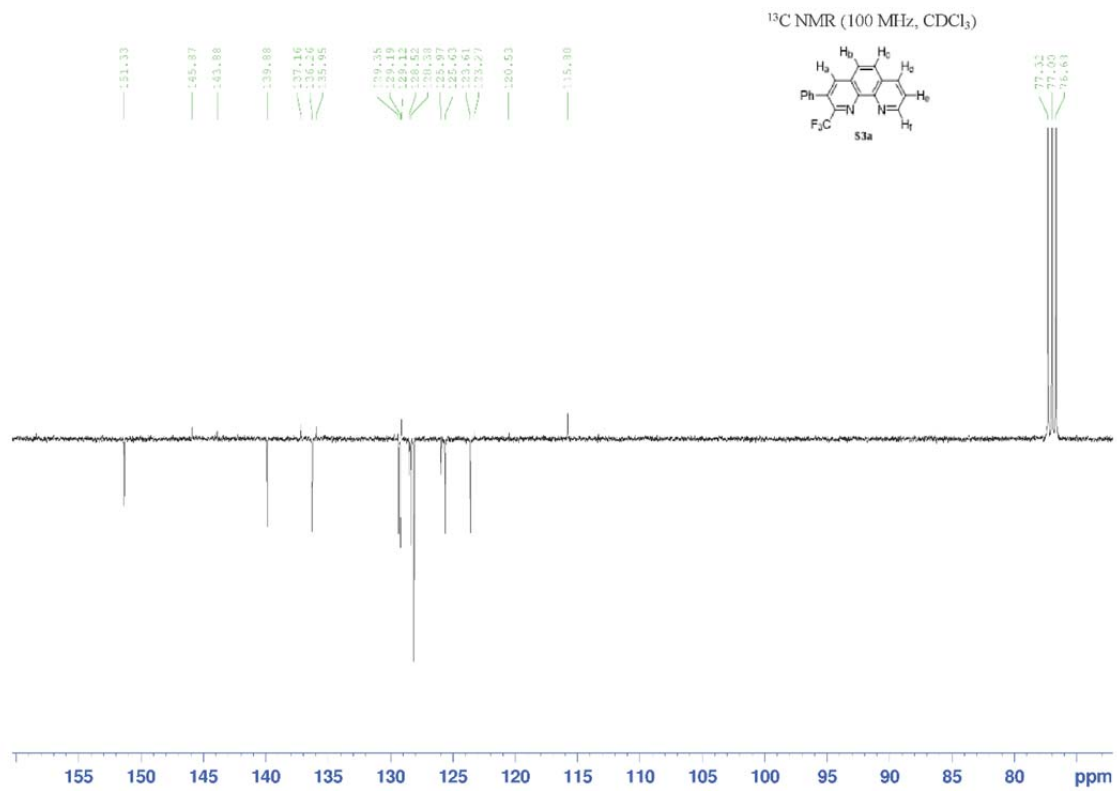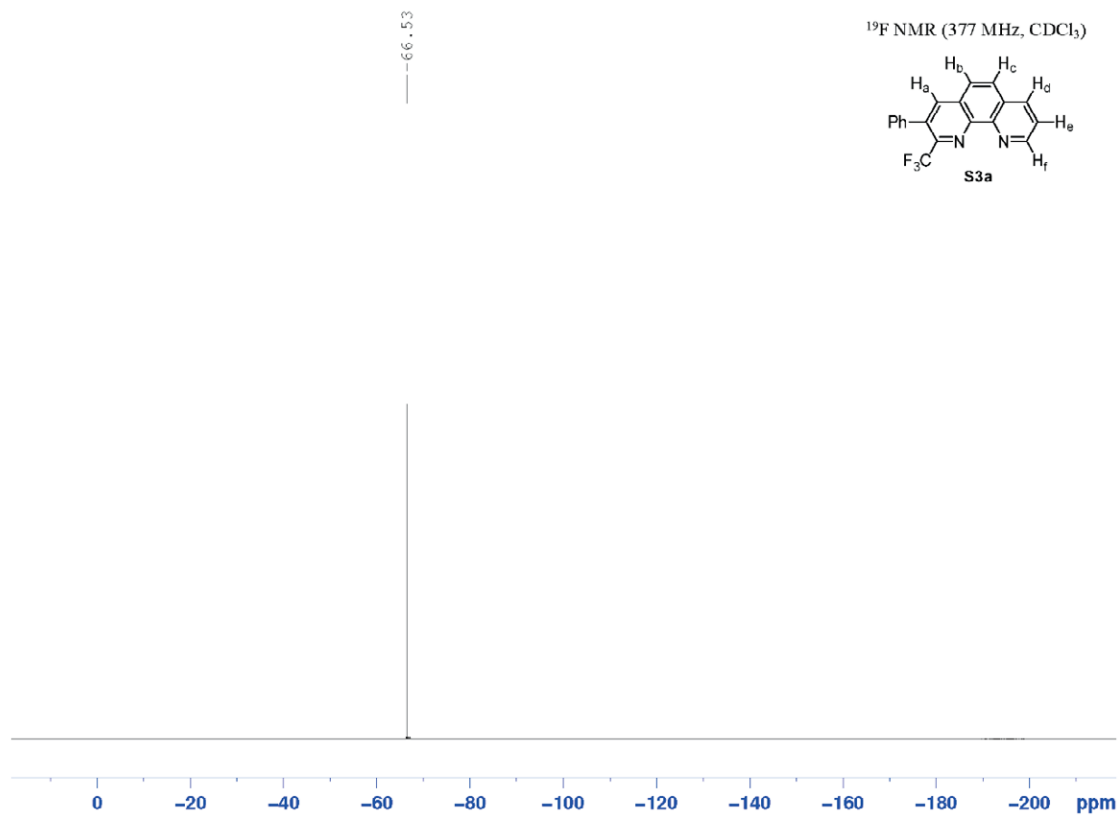

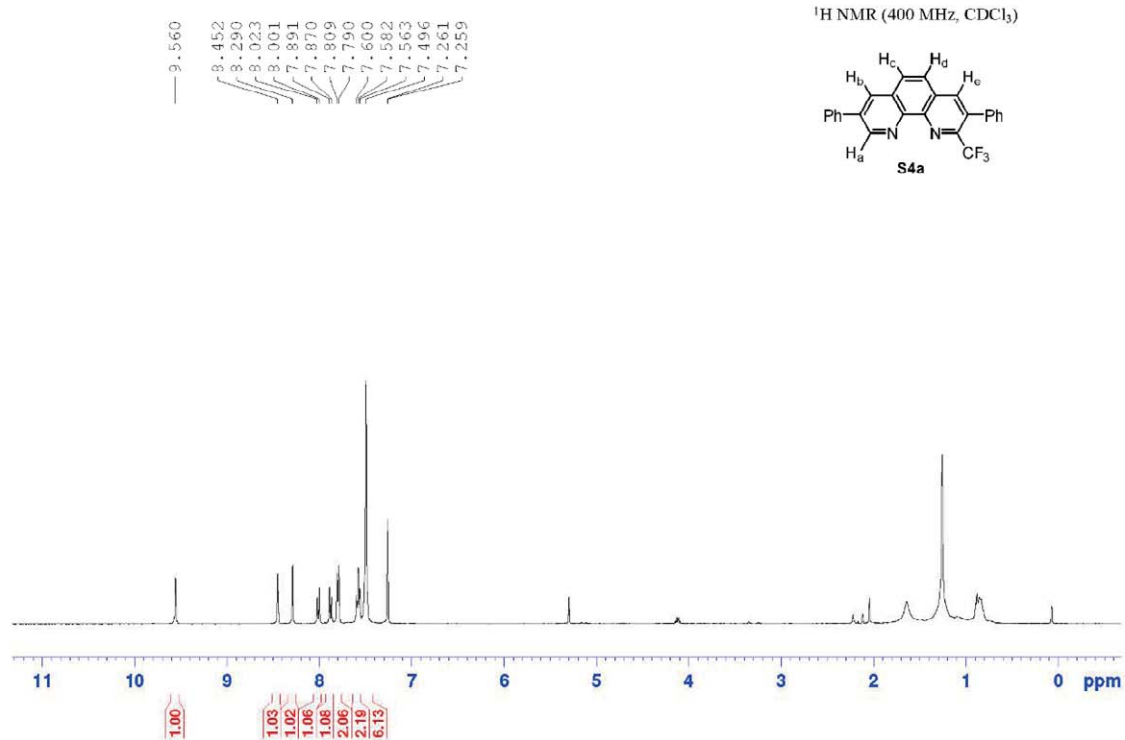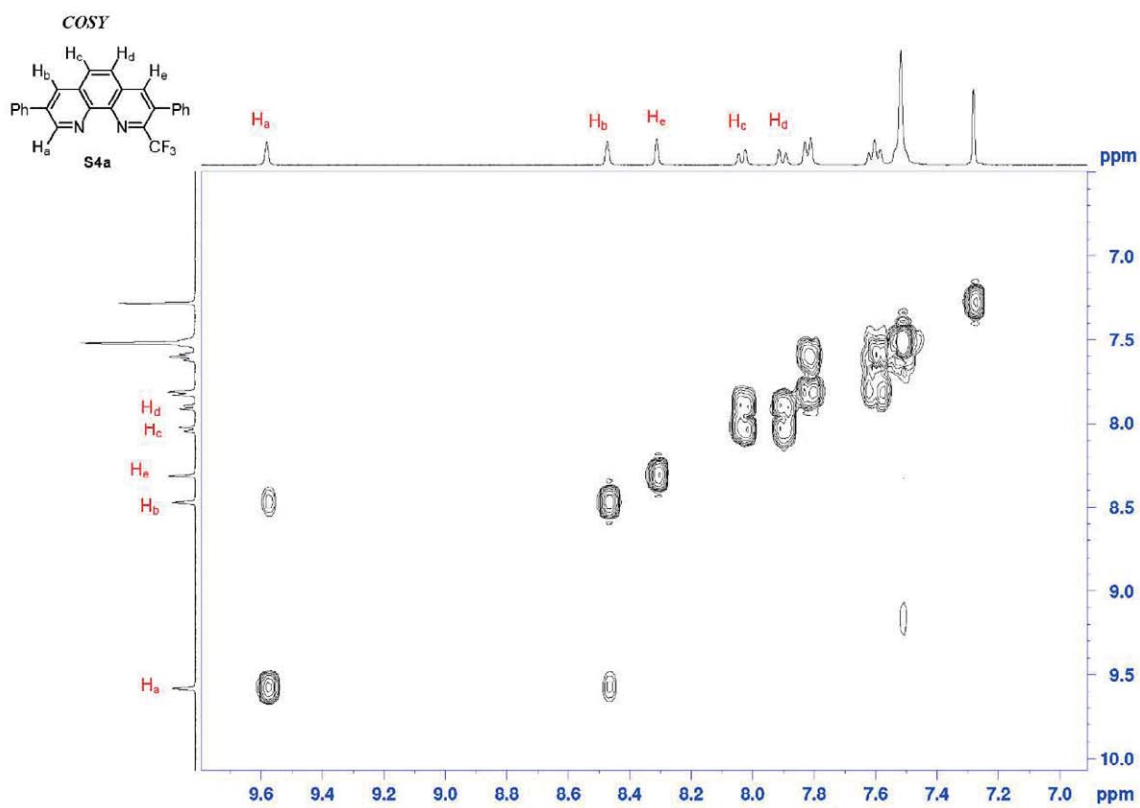

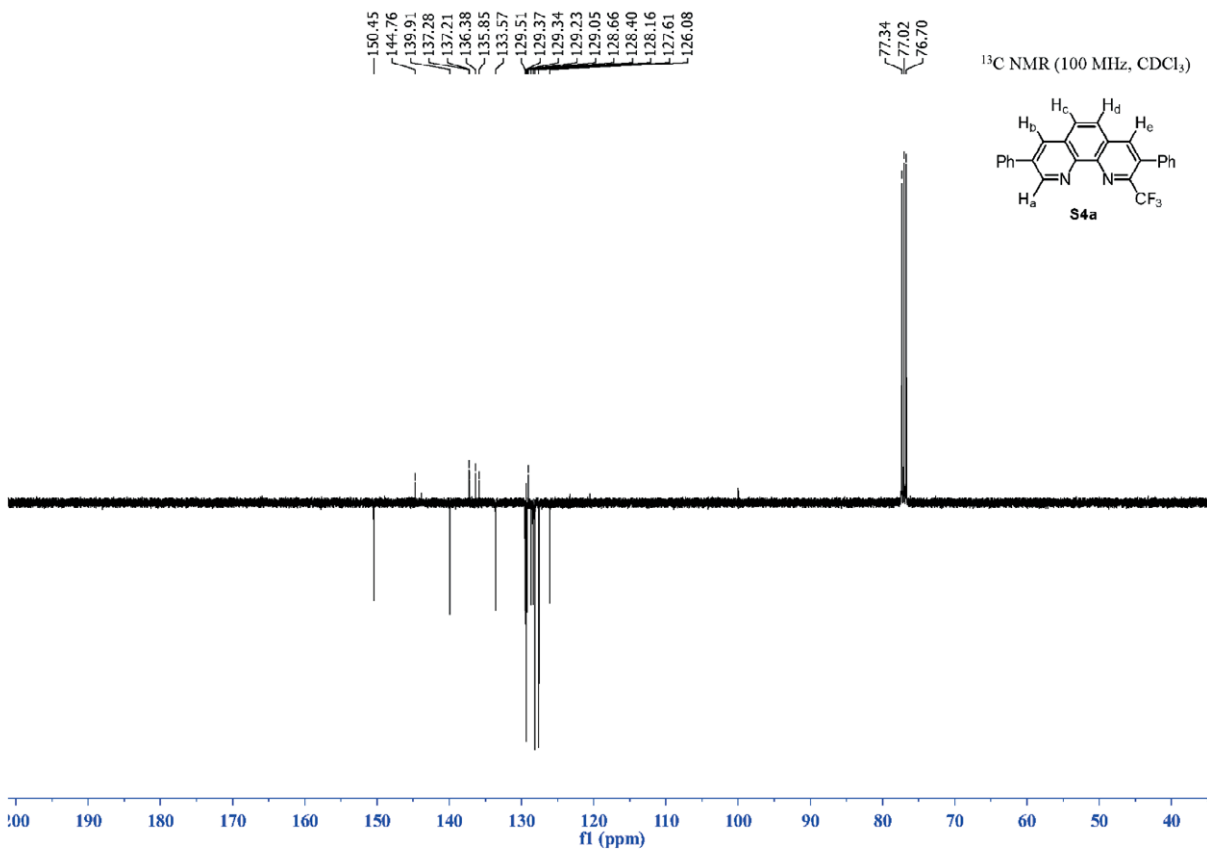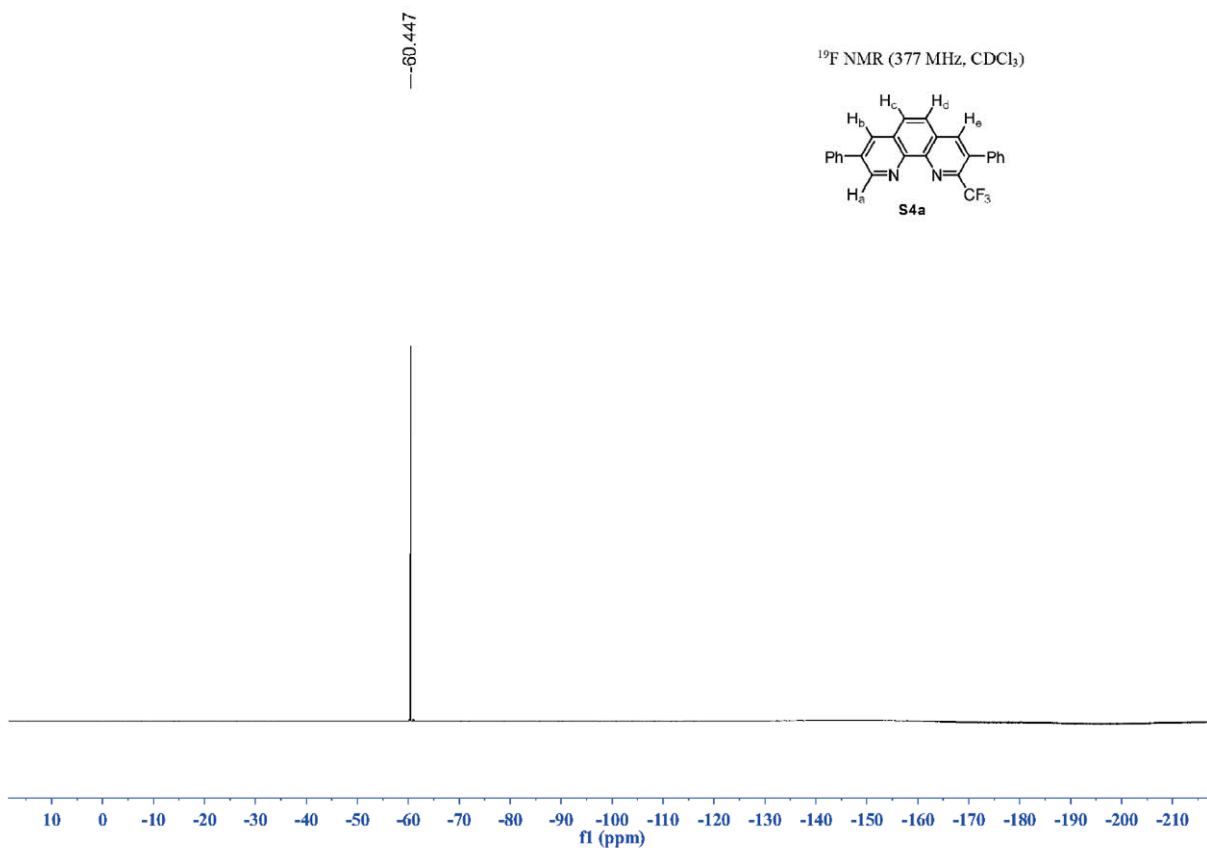



9.477  
9.466  
9.318  
9.296  
8.853  
8.498  
8.478  
8.196  
8.174  
7.874  
7.863  
7.854  
7.843  
7.261

<sup>1</sup>H NMR (400 MHz, CDCl<sub>3</sub>)

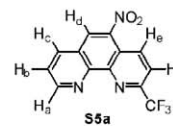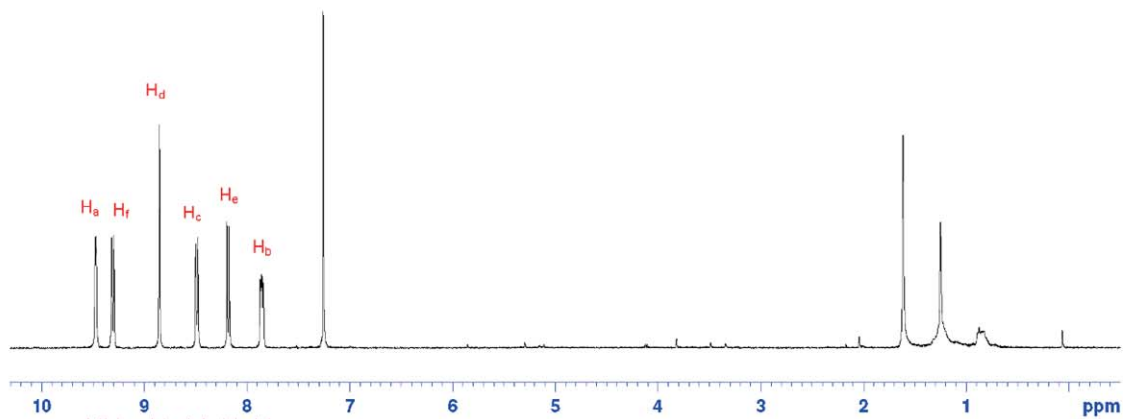

*COSY*

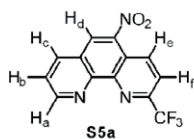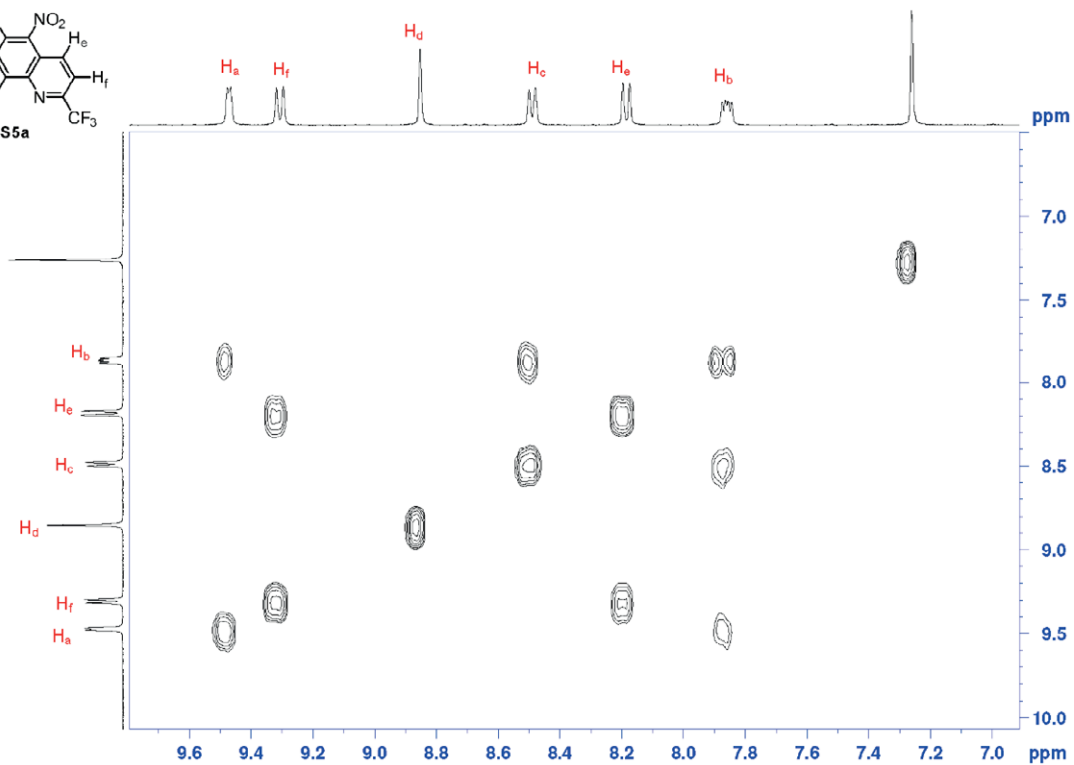

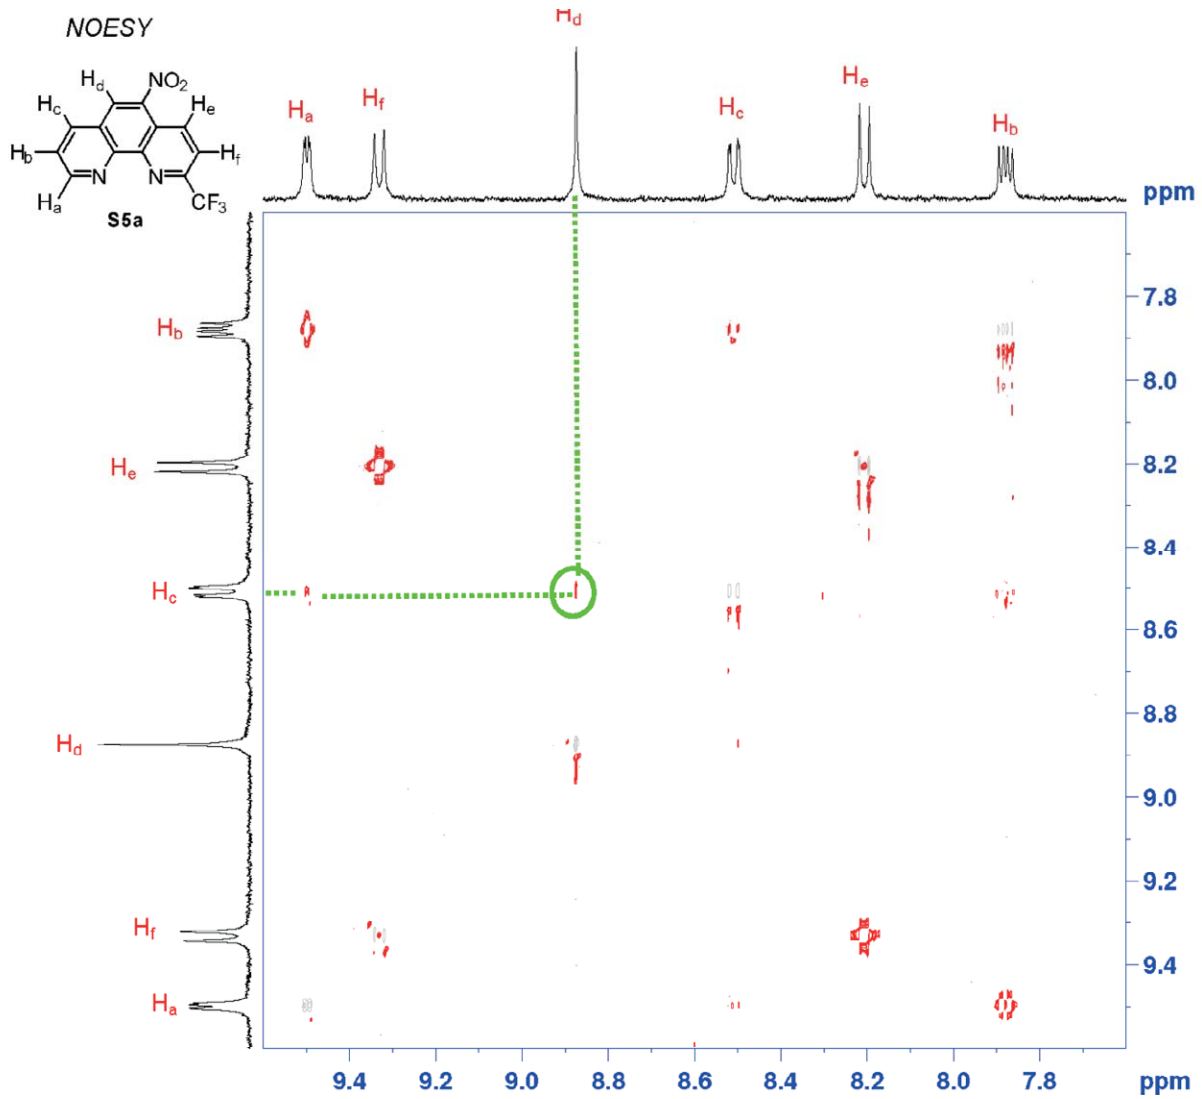

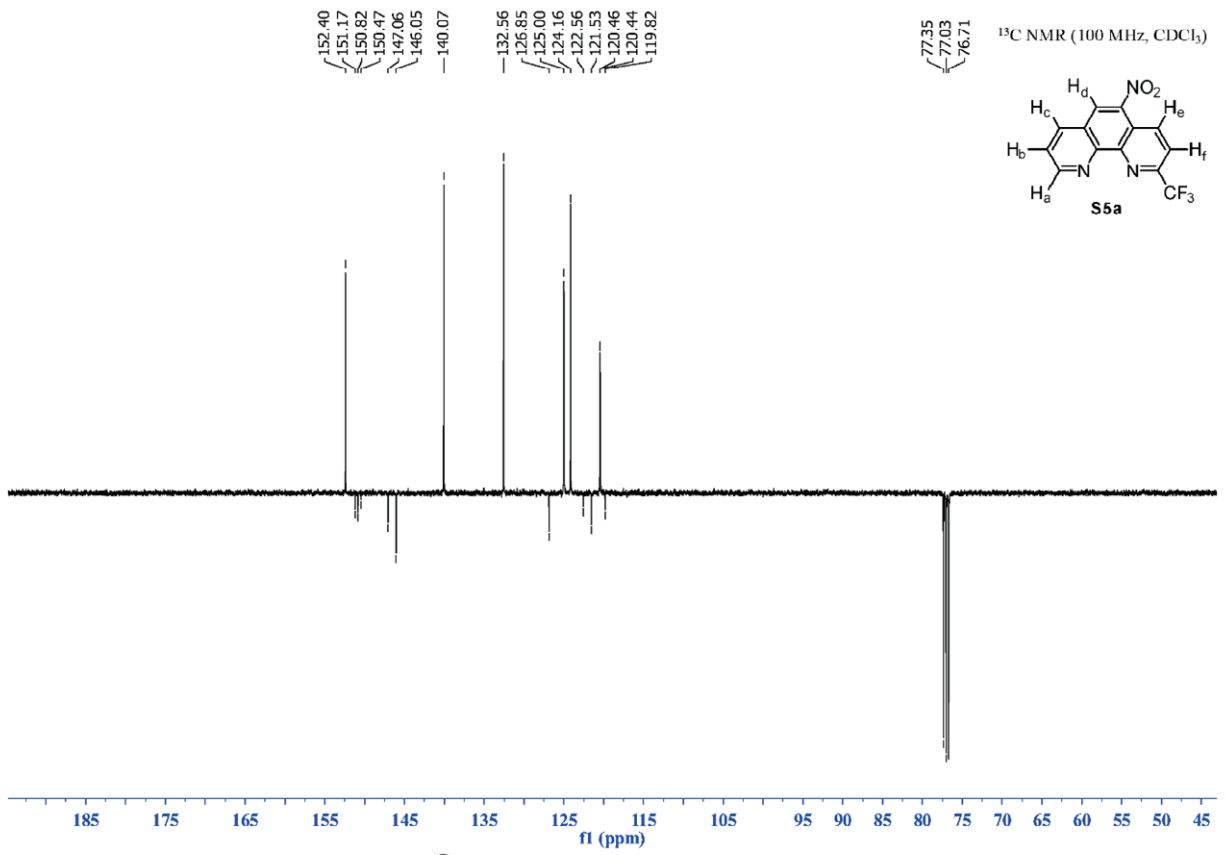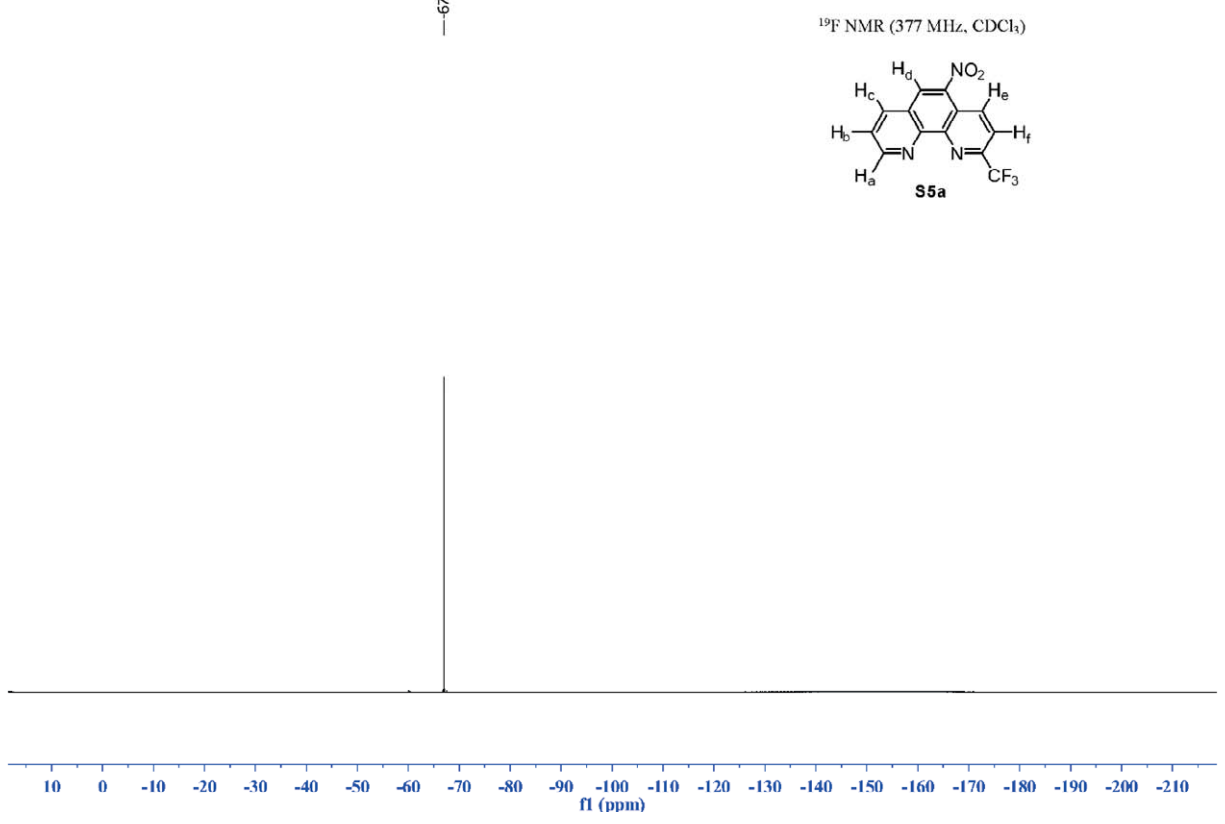

9.408  
9.398  
9.002  
8.980  
8.696  
8.667  
8.646  
8.143  
8.123  
7.897  
7.886  
7.875  
7.865  
7.260

<sup>1</sup>H NMR (400 MHz, CDCl<sub>3</sub>)

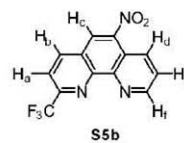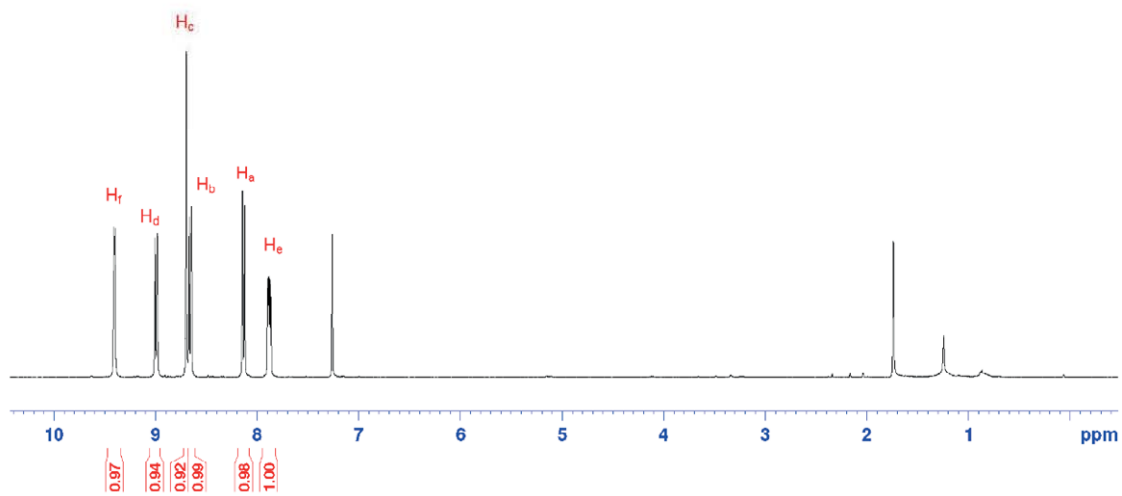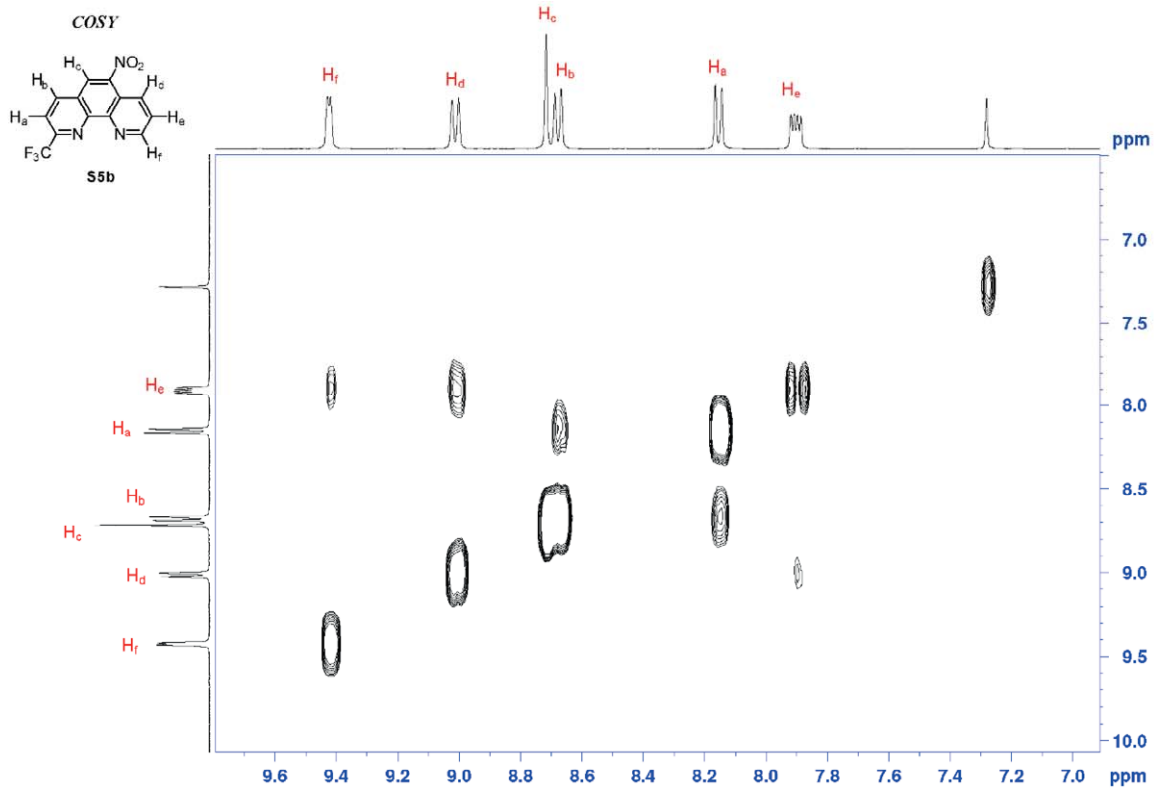

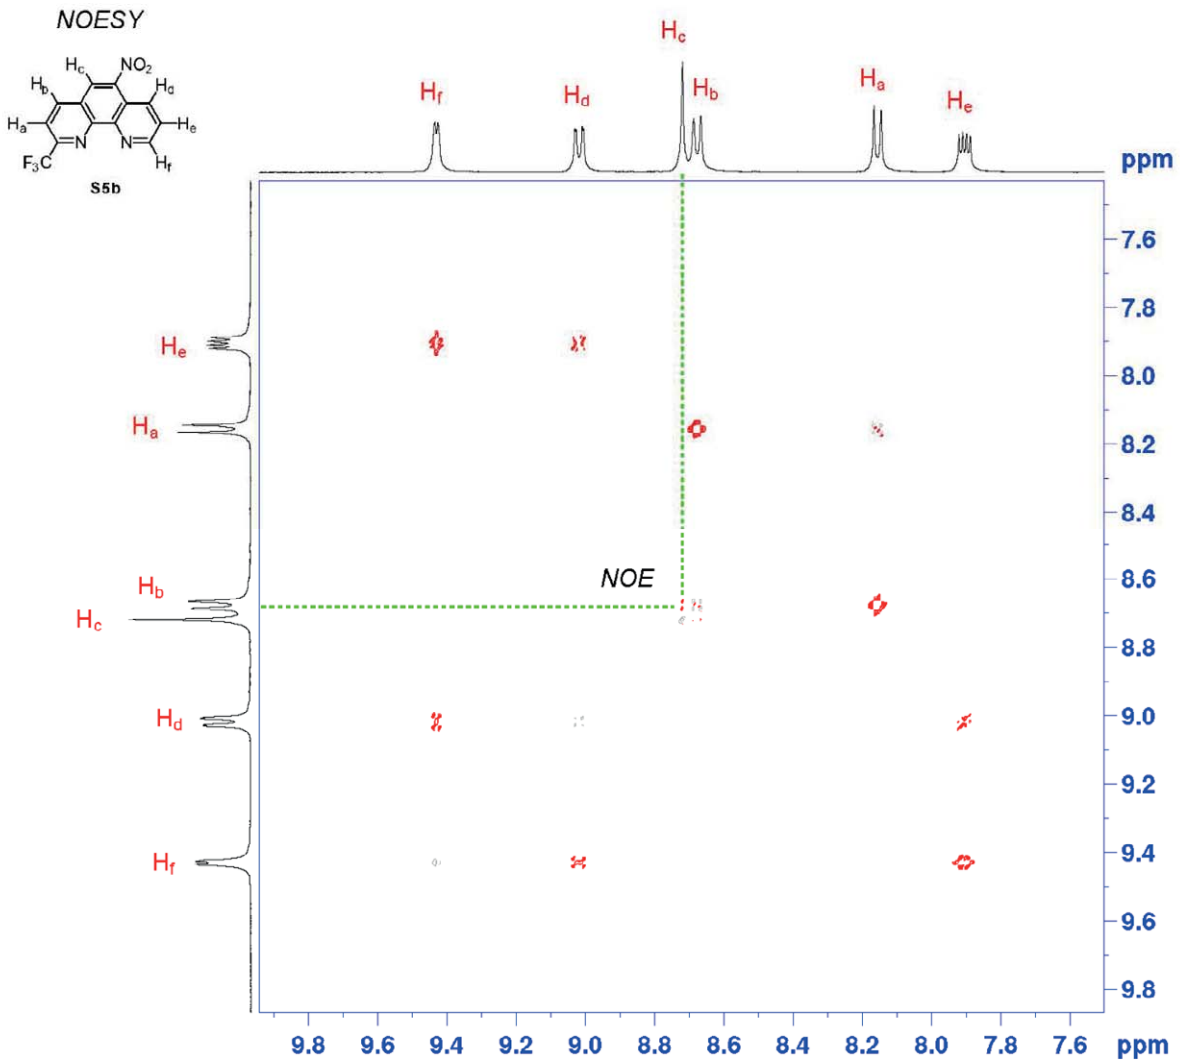

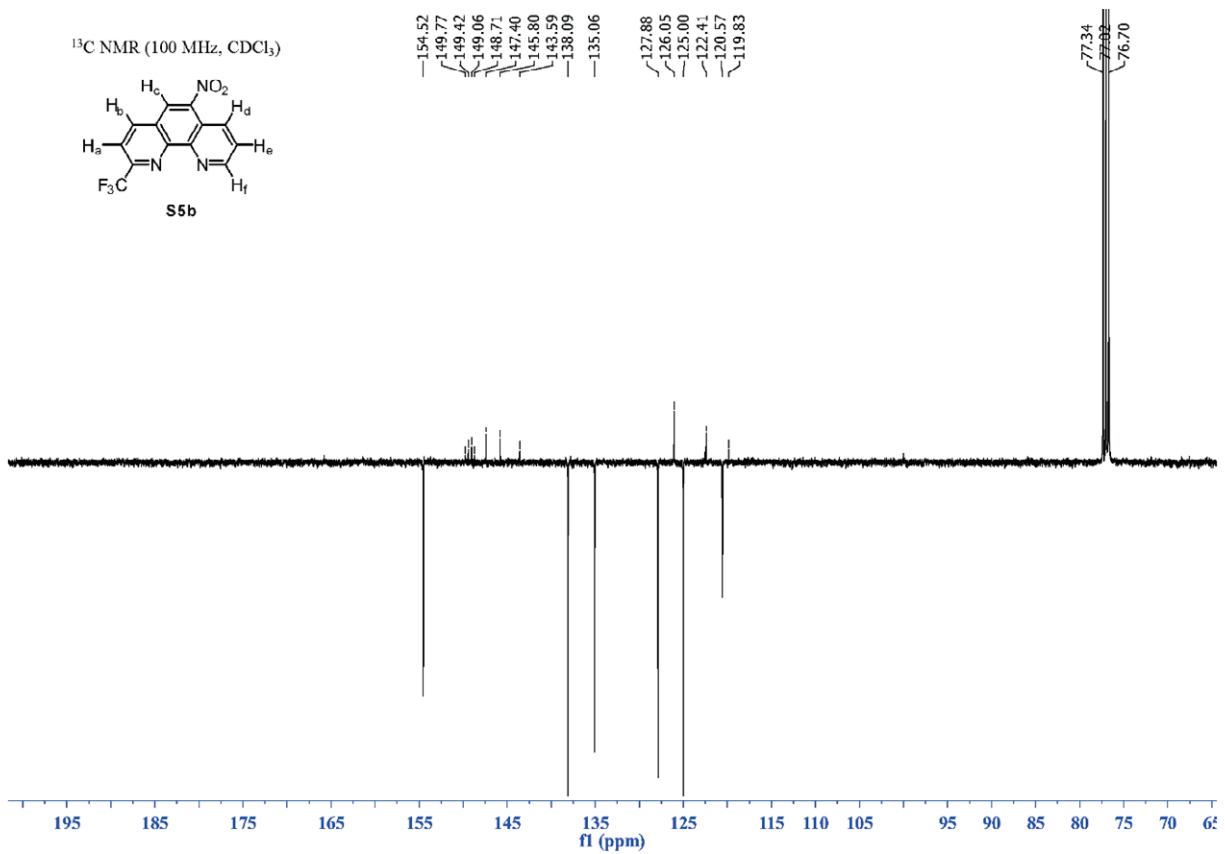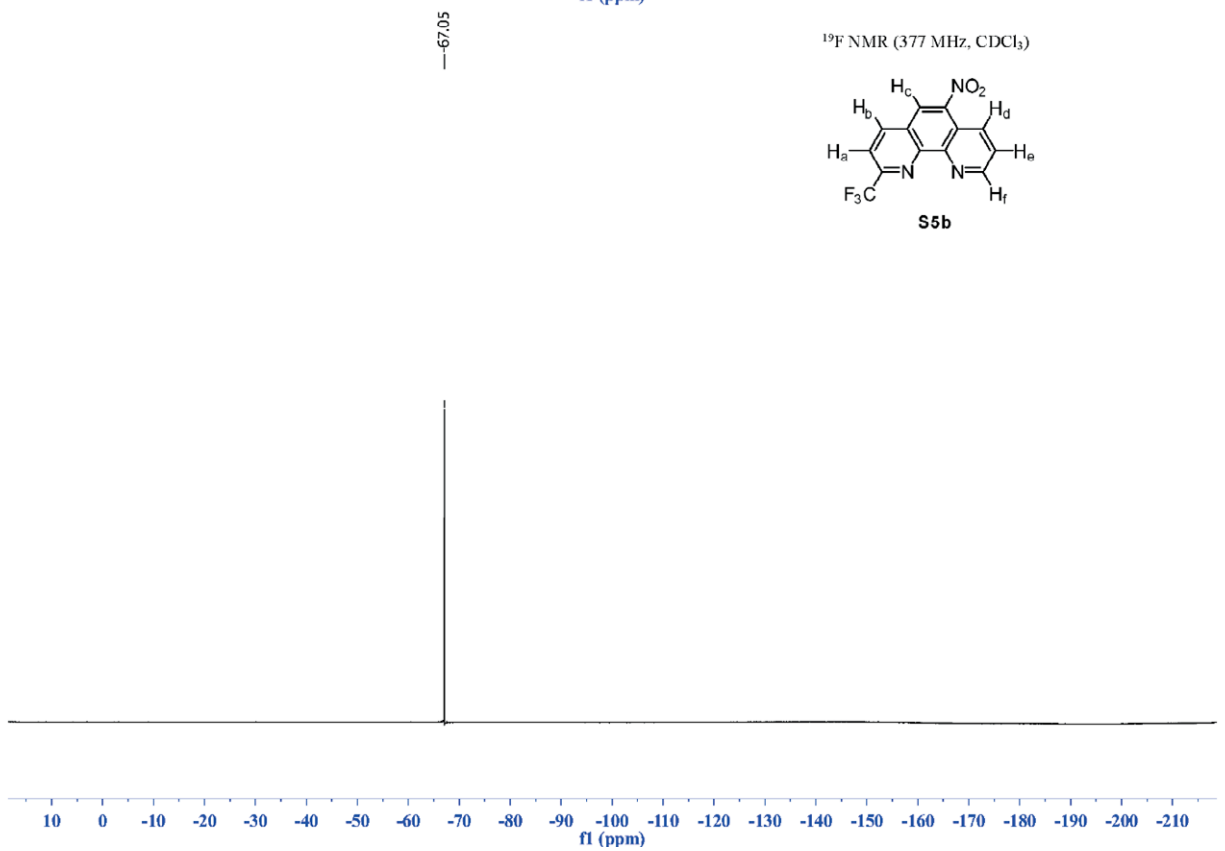

Supplement: NIHMS750276-supplement-SI.pdf [file NIHMS750276-supplement-SI.pdf]
